# Supplementary material for: Microwave-assisted synthesis of novel purine nucleosides as selective cholinesterase inhibitors
Source: Royal Society of Chemistry journal article supplement (doi:10.1039/c4ob00142g), 2014-01-01
Supplement: c4ob00142g1.pdf [file c4ob00142g1.pdf]

## Supporting Information

### Microwave assisted synthesis of novel purine nucleosides as selective cholinesterase inhibitors

*Stefan Schwarz,<sup>a,b</sup> René Csuk,<sup>b</sup> Amélia P. Rauter<sup>\*a</sup>*

<sup>a</sup>Centro de Química e Bioquímica/Departamento de Química e Bioquímica, Faculdade de Ciências, Universidade de Lisboa, Campo Grande, Ed. C8, Piso 5, 1749-016 Lisboa, Portugal; email: [aprauter@fc.ul.pt](mailto:aprauter@fc.ul.pt)

<sup>b</sup>Bereich Organische Chemie, Martin-Luther-Universität Halle-Wittenberg, Kurt-Mothes-Str. 2, D-06120 Halle (Saale), Germany

Corresponding author. E-mail: [aprauter@fc.ul.pt](mailto:aprauter@fc.ul.pt)

Centro de Química e Bioquímica/Departamento de Química e Bioquímica, Faculdade de Ciências, Universidade de Lisboa, Campo Grande, Ed. C8, Piso 5, 1749-016 Lisboa, Portugal. Telephone: +351 21 7500952. Fax: +351 21 7500088.

## Table of Contents

|                                                                                                                                                      |     |
|------------------------------------------------------------------------------------------------------------------------------------------------------|-----|
| <b>Figure S1.</b> <sup>1</sup> H NMR spectrum of 6-Chloro-7-(2,3,4,6-tetra- <i>O</i> -acetyl-β-D-glucopyranosyl)purine (1).....                      | S4  |
| <b>Figure S2.</b> <sup>13</sup> C NMR spectrum of 6-Chloro-7-(2,3,4,6-tetra- <i>O</i> -acetyl-β-D-glucopyranosyl)purine (1).....                     | S4  |
| <b>Figure S3.</b> <sup>1</sup> H NMR spectrum of 6-Chloro-9-(2,3,4,6-tetra- <i>O</i> -acetyl-β-D-glucopyranosyl)purine (2).....                      | S5  |
| <b>Figure S4.</b> <sup>13</sup> C NMR spectrum of 6-Chloro-9-(2,3,4,6-tetra- <i>O</i> -acetyl-β-D-glucopyranosyl)purine (2).....                     | S5  |
| <b>Figure S5.</b> <sup>1</sup> H NMR spectrum of 6-Chloro-7-(2,3,4,6-tetra- <i>O</i> -benzyl-α-D-glucopyranosyl)purine (3).....                      | S6  |
| <b>Figure S6.</b> <sup>13</sup> C NMR spectrum of 6-Chloro-7-(2,3,4,6-tetra- <i>O</i> -benzyl-α-D-glucopyranosyl)purine (3).....                     | S6  |
| <b>Figure S7.</b> <sup>1</sup> H NMR spectrum of 6-Chloro-7-(2,3,4,6-tetra- <i>O</i> -benzyl-β-D-glucopyranosyl)purine (4).....                      | S7  |
| <b>Figure S8.</b> <sup>13</sup> C NMR spectrum of 6-Chloro-7-(2,3,4,6-tetra- <i>O</i> -benzyl-β-D-glucopyranosyl)purine (4).....                     | S7  |
| <b>Figure S9.</b> <sup>1</sup> H NMR spectrum of 6-Chloro-9-(2,3,4,6-tetra- <i>O</i> -benzyl-α-D-glucopyranosyl)purine (5).....                      | S8  |
| <b>Figure S10.</b> <sup>13</sup> C NMR spectrum of 6-Chloro-9-(2,3,4,6-tetra- <i>O</i> -benzyl-α-D-glucopyranosyl)purine (5).....                    | S8  |
| <b>Figure S11.</b> <sup>1</sup> H NMR spectrum of 6-Chloro-9-(2,3,4,6-tetra- <i>O</i> -benzyl-β-D-glucopyranosyl)purine (6).....                     | S9  |
| <b>Figure S12.</b> <sup>13</sup> C NMR spectrum of 6-Chloro-9-(2,3,4,6-tetra- <i>O</i> -benzyl-β-D-glucopyranosyl)purine (6).....                    | S9  |
| <b>Figure S13.</b> <sup>1</sup> H NMR spectrum of 6-Chloro-7-(2,3,4,6-tetra- <i>O</i> -benzyl-β-D-galactopyranosyl)purine (7).....                   | S10 |
| <b>Figure S14.</b> <sup>13</sup> C NMR spectrum of 6-Chloro-7-(2,3,4,6-tetra- <i>O</i> -benzyl-β-D-galactopyranosyl)purine (7).....                  | S10 |
| <b>Figure S15.</b> <sup>1</sup> H NMR spectrum of 6-Chloro-9-(2,3,4,6-tetra- <i>O</i> -benzyl-α-D-galactopyranosyl)purine (8).....                   | S11 |
| <b>Figure S16.</b> <sup>13</sup> C NMR spectrum of 6-Chloro-9-(2,3,4,6-tetra- <i>O</i> -benzyl-α-D-galactopyranosyl)purine (8).....                  | S11 |
| <b>Figure S17.</b> <sup>1</sup> H NMR spectrum of 6-Chloro-9-(2,3,4,6-tetra- <i>O</i> -benzyl-β-D-galactopyranosyl)purine (9).....                   | S12 |
| <b>Figure S18.</b> <sup>13</sup> C NMR spectrum of 6-Chloro-9-(2,3,4,6-tetra- <i>O</i> -benzyl-β-D-galactopyranosyl)purine (9).....                  | S12 |
| <b>Figure S19.</b> <sup>1</sup> H NMR spectrum of 6-Chloro-7-(2,3,4,6-tetra- <i>O</i> -benzyl-α-D-mannopyranosyl)purine (10).....                    | S13 |
| <b>Figure S20.</b> <sup>13</sup> C NMR spectrum of 6-Chloro-7-(2,3,4,6-tetra- <i>O</i> -benzyl-α-D-mannopyranosyl)purine (10).....                   | S13 |
| <b>Figure S21.</b> <sup>1</sup> H NMR spectrum of 6-Chloro-7-(2,3,4,6-tetra- <i>O</i> -benzyl-β-D-mannopyranosyl)purine (11).....                    | S14 |
| <b>Figure S22.</b> <sup>13</sup> C NMR spectrum of 6-Chloro-7-(2,3,4,6-tetra- <i>O</i> -benzyl-β-D-mannopyranosyl)purine (11).....                   | S14 |
| <b>Figure S23.</b> <sup>1</sup> H NMR spectrum of 6-Chloro-9-(2,3,4,6-tetra- <i>O</i> -benzyl-α-D-mannopyranosyl)purine (12).....                    | S15 |
| <b>Figure S24.</b> <sup>13</sup> C NMR spectrum of 6-Chloro-9-(2,3,4,6-tetra- <i>O</i> -benzyl-α-D-mannopyranosyl)purine (12).....                   | S15 |
| <b>Figure S25.</b> <sup>1</sup> H NMR spectrum of 6-Chloro-9-(2,3,4,6-tetra- <i>O</i> -benzyl-β-D-mannopyranosyl)purine (13).....                    | S16 |
| <b>Figure S26.</b> <sup>13</sup> C NMR spectrum of 6-Chloro-9-(2,3,4,6-tetra- <i>O</i> -benzyl-β-D-mannopyranosyl)purine (13).....                   | S16 |
| <b>Figure S27.</b> <sup>1</sup> H NMR spectrum of 2-(Acetylamino)-6-chloro-7-(2,3,4,6-tetra- <i>O</i> -benzyl-α-D-glucopyranosyl)purine (14).....    | S17 |
| <b>Figure S28.</b> <sup>13</sup> C NMR spectrum of 2-(Acetylamino)-6-chloro-7-(2,3,4,6-tetra- <i>O</i> -benzyl-α-D-glucopyranosyl)purine (14).....   | S17 |
| <b>Figure S29.</b> <sup>1</sup> H NMR spectrum of 2-(Acetylamino)-6-chloro-7-(2,3,4,6-tetra- <i>O</i> -benzyl-β-D-glucopyranosyl)purine (15).....    | S18 |
| <b>Figure S30.</b> <sup>13</sup> C NMR spectrum of 2-(Acetylamino)-6-chloro-7-(2,3,4,6-tetra- <i>O</i> -benzyl-β-D-glucopyranosyl)purine (15).....   | S18 |
| <b>Figure S31.</b> <sup>1</sup> H NMR spectrum of 2-(Acetylamino)-6-chloro-9-(2,3,4,6-tetra- <i>O</i> -benzyl-β-D-glucopyranosyl)purine (16).....    | S19 |
| <b>Figure S32.</b> <sup>13</sup> C NMR spectrum of 2-(Acetylamino)-6-chloro-9-(2,3,4,6-tetra- <i>O</i> -benzyl-β-D-glucopyranosyl)purine (16).....   | S19 |
| <b>Figure S33.</b> <sup>1</sup> H NMR spectrum of 2-(Acetylamino)-6-chloro-7-(2,3,4,6-tetra- <i>O</i> -benzyl-α-D-galactopyranosyl)purine (17).....  | S20 |
| <b>Figure S34.</b> <sup>13</sup> C NMR spectrum of 2-(Acetylamino)-6-chloro-7-(2,3,4,6-tetra- <i>O</i> -benzyl-α-D-galactopyranosyl)purine (17)..... | S20 |
| <b>Figure S35.</b> <sup>1</sup> H NMR spectrum of 2-(Acetylamino)-6-chloro-7-(2,3,4,6-tetra- <i>O</i> -benzyl-β-D-galactopyranosyl)purine (18).....  | S21 |
| <b>Figure S36.</b> <sup>13</sup> C NMR spectrum of 2-(Acetylamino)-6-chloro-7-(2,3,4,6-tetra- <i>O</i> -benzyl-β-D-galactopyranosyl)purine (18)..... | S21 |
| <b>Figure S37.</b> <sup>1</sup> H NMR spectrum of 2-(Acetylamino)-6-chloro-9-(2,3,4,6-tetra- <i>O</i> -benzyl-α-D-galactopyranosyl)purine (19).....  | S22 |
| <b>Figure S38.</b> <sup>13</sup> C NMR spectrum of 2-(Acetylamino)-6-chloro-9-(2,3,4,6-tetra- <i>O</i> -benzyl-α-D-galactopyranosyl)purine (19)..... | S22 |
| <b>Figure S39.</b> <sup>1</sup> H NMR spectrum of 2-(Acetylamino)-6-chloro-9-(2,3,4,6-tetra- <i>O</i> -benzyl-β-D-galactopyranosyl)purine (20).....  | S23 |

|                                                                                                                                                              |     |
|--------------------------------------------------------------------------------------------------------------------------------------------------------------|-----|
| <b>Figure S40.</b> $^{13}\text{C}$ NMR spectrum of 2-(Acetylamino)-6-chloro-9-(2,3,4,6-tetra- <i>O</i> -benzyl- $\beta$ -D-galactopyranosyl)purine (20)..... | S23 |
| <b>Figure S41.</b> $^1\text{H}$ NMR spectrum of 2-(Acetylamino)-6-chloro-7-(2,3,4,6-tetra- <i>O</i> -benzyl- $\alpha$ -D-mannopyranosyl)purine (21).....     | S24 |
| <b>Figure S42.</b> $^{13}\text{C}$ NMR spectrum of 2-(Acetylamino)-6-chloro-7-(2,3,4,6-tetra- <i>O</i> -benzyl- $\alpha$ -D-mannopyranosyl)purine (21).....  | S24 |
| <b>Figure S43.</b> $^1\text{H}$ NMR spectrum of 2-(Acetylamino)-6-chloro-7-(2,3,4,6-tetra- <i>O</i> -benzyl- $\beta$ -D-mannopyranosyl)purine (22) .....     | S25 |
| <b>Figure S44.</b> $^{13}\text{C}$ NMR spectrum of 2-(Acetylamino)-6-chloro-7-(2,3,4,6-tetra- <i>O</i> -benzyl- $\beta$ -D-mannopyranosyl)purine (22).....   | S25 |
| <b>Figure S45.</b> $^1\text{H}$ NMR spectrum of 2-(Acetylamino)-6-chloro-9-(2,3,4,6-tetra- <i>O</i> -benzyl- $\alpha$ -D-mannopyranosyl)purine (23) .....    | S26 |
| <b>Figure S46.</b> $^{13}\text{C}$ NMR spectrum of 2-(Acetylamino)-6-chloro-9-(2,3,4,6-tetra- <i>O</i> -benzyl- $\alpha$ -D-mannopyranosyl)purine (23) ..... | S26 |
| <b>Figure S47.</b> $^1\text{H}$ NMR spectrum of 2-(Acetylamino)-6-chloro-9-(2,3,4,6-tetra- <i>O</i> -benzyl- $\beta$ -D-mannopyranosyl)purine (24).....      | S27 |
| <b>Figure S48.</b> $^{13}\text{C}$ NMR spectrum of 2-(Acetylamino)-6-chloro-9-(2,3,4,6-tetra- <i>O</i> -benzyl- $\beta$ -D-mannopyranosyl)purine (24) .....  | S27 |

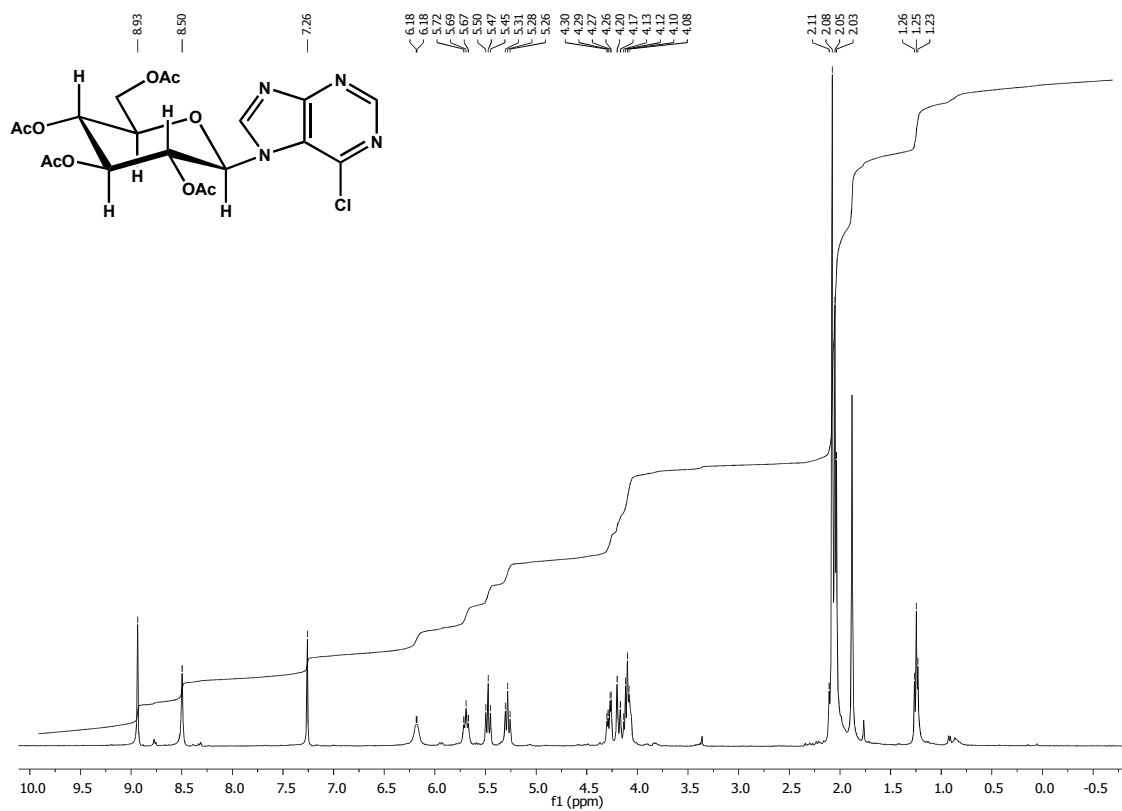

**Figure S1.** <sup>1</sup>H NMR spectrum of 6-Chloro-7-(2,3,4,6-tetra-*O*-acetyl-β-D-glucopyranosyl)purine (1)

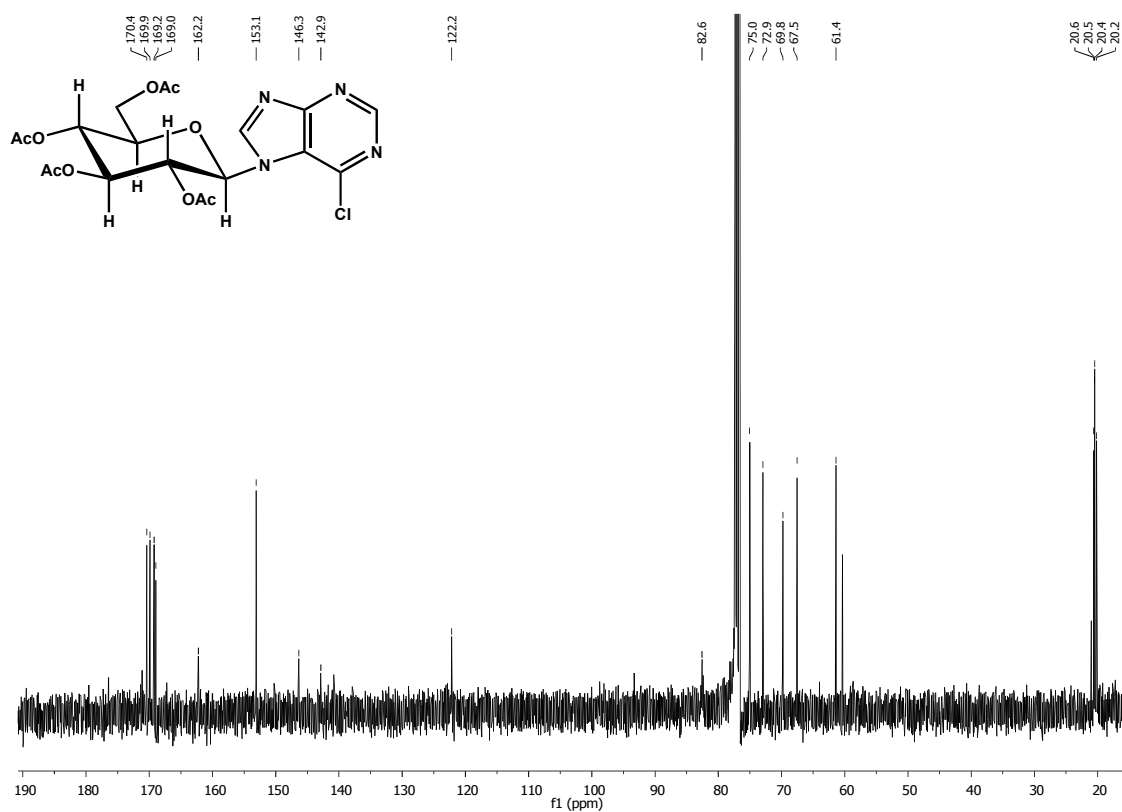

**Figure S2.** <sup>13</sup>C NMR spectrum of 6-Chloro-7-(2,3,4,6-tetra-*O*-acetyl-β-D-glucopyranosyl)purine (1)

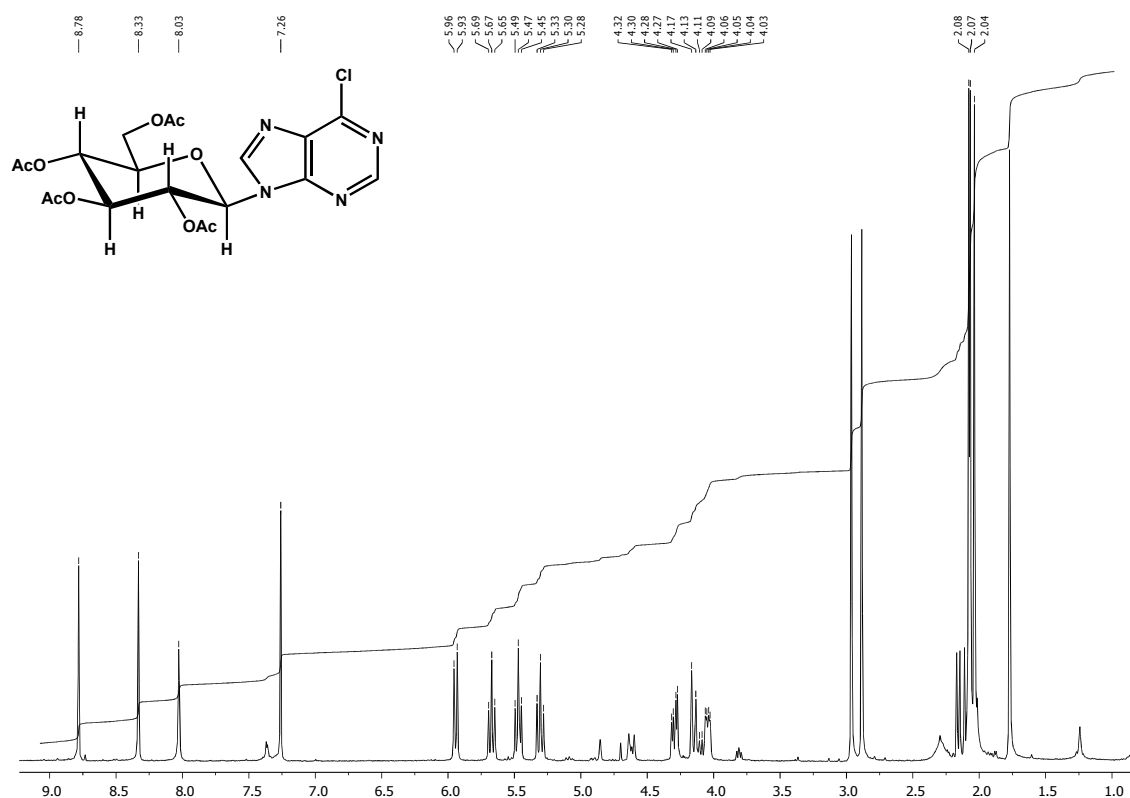

**Figure S3.**  $^1\text{H}$  NMR spectrum of 6-Chloro-9-(2,3,4,6-tetra-*O*-acetyl- $\beta$ -D-glucopyranosyl)purine (**2**)

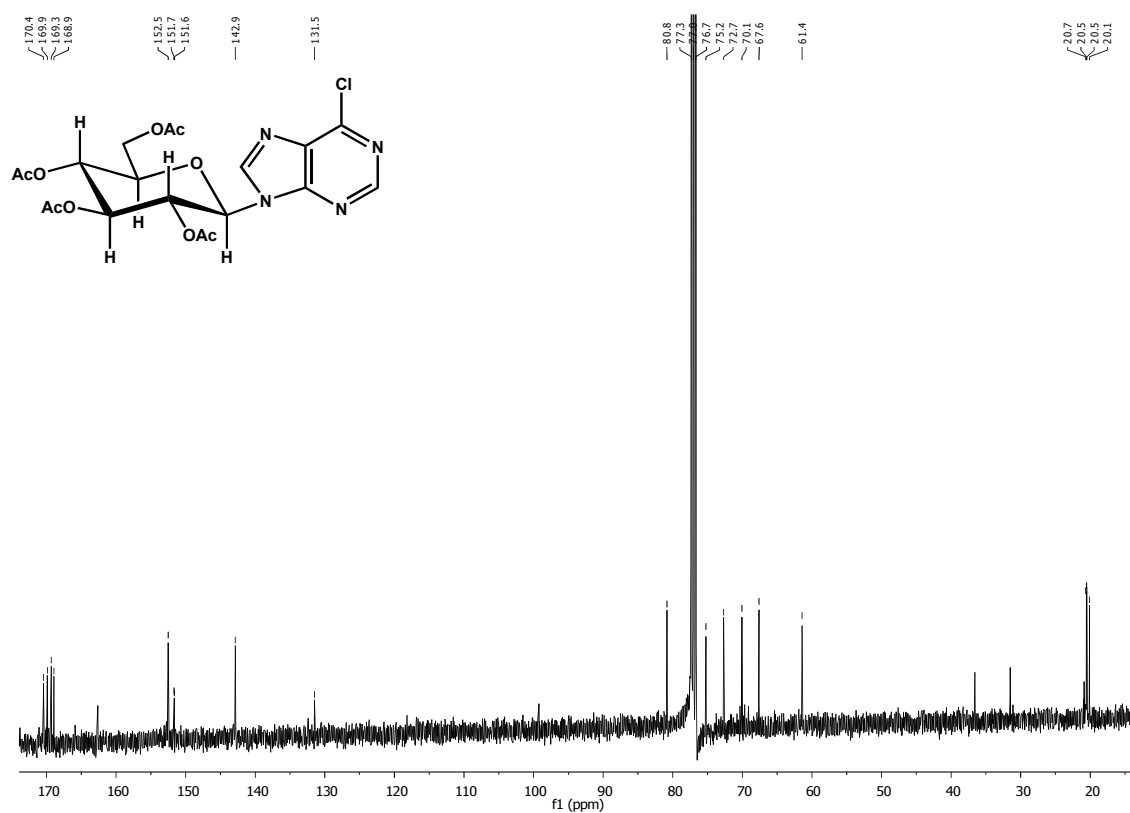

**Figure S4.**  $^{13}\text{C}$  NMR spectrum of 6-Chloro-9-(2,3,4,6-tetra-*O*-acetyl- $\beta$ -D-glucopyranosyl)purine (**2**)

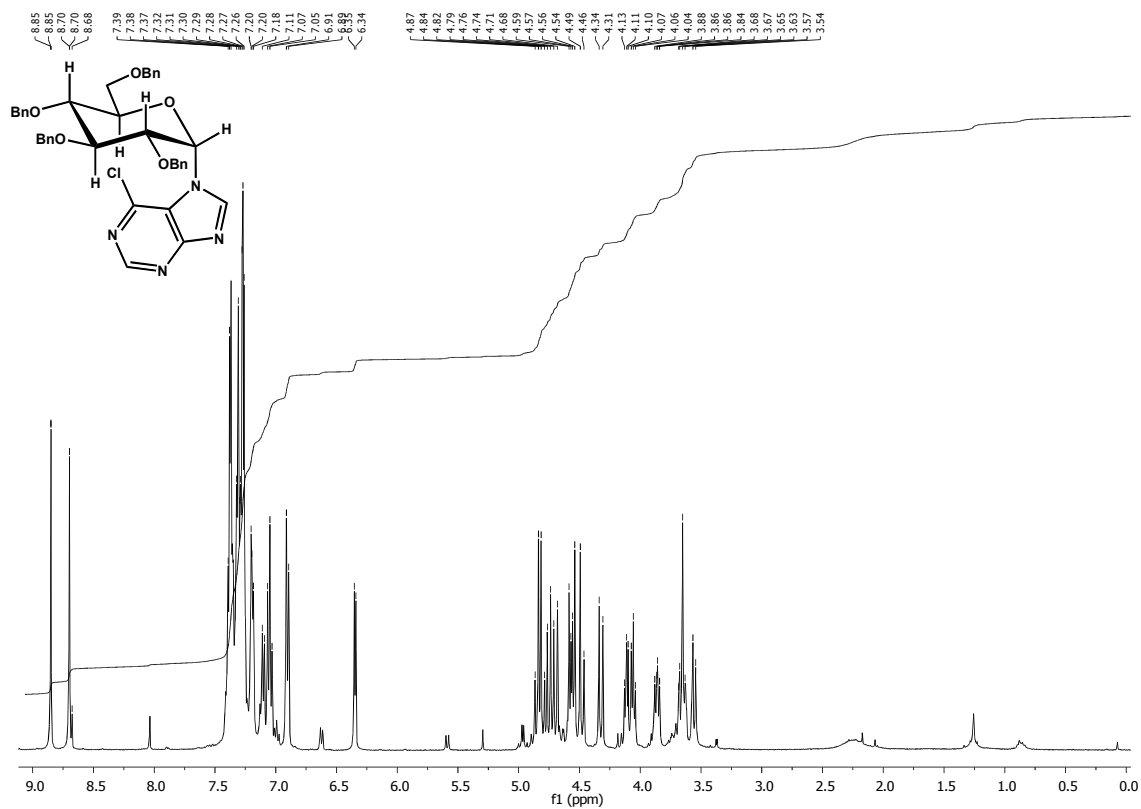

**Figure S5.**  $^1\text{H}$  NMR spectrum of 6-Chloro-7-(2,3,4,6-tetra-*O*-benzyl- $\alpha$ -D-glucopyranosyl)purine (**3**)

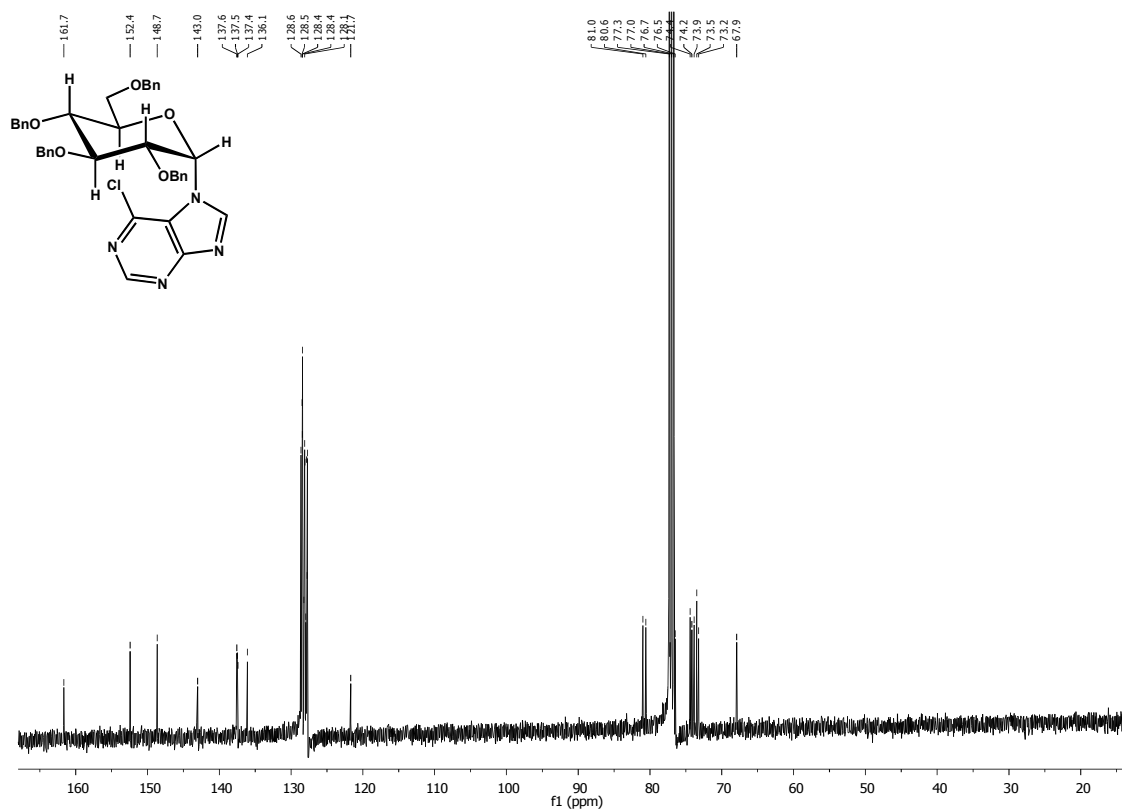

**Figure S6.**  $^{13}\text{C}$  NMR spectrum of 6-Chloro-7-(2,3,4,6-tetra-*O*-benzyl- $\alpha$ -D-glucopyranosyl)purine (**3**)

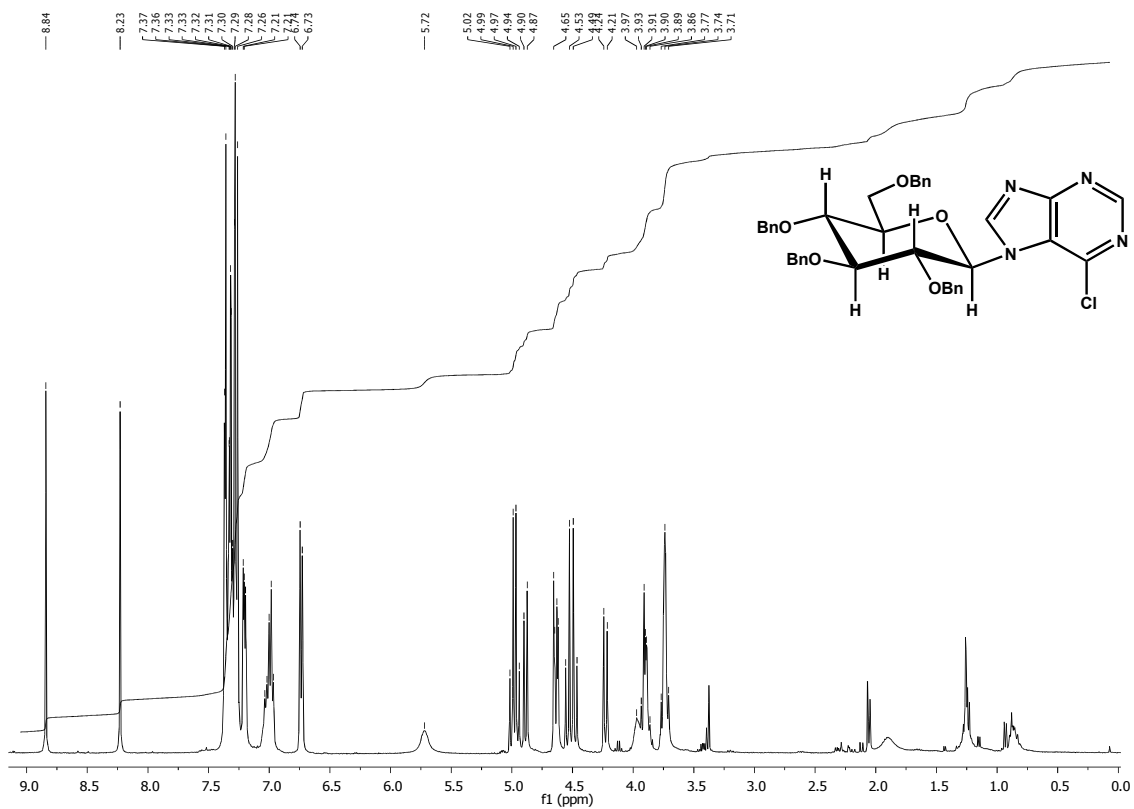

Figure S7. <sup>1</sup>H NMR spectrum of 6-Chloro-7-(2,3,4,6-tetra-*O*-benzyl-β-D-glucopyranosyl)purine (4)

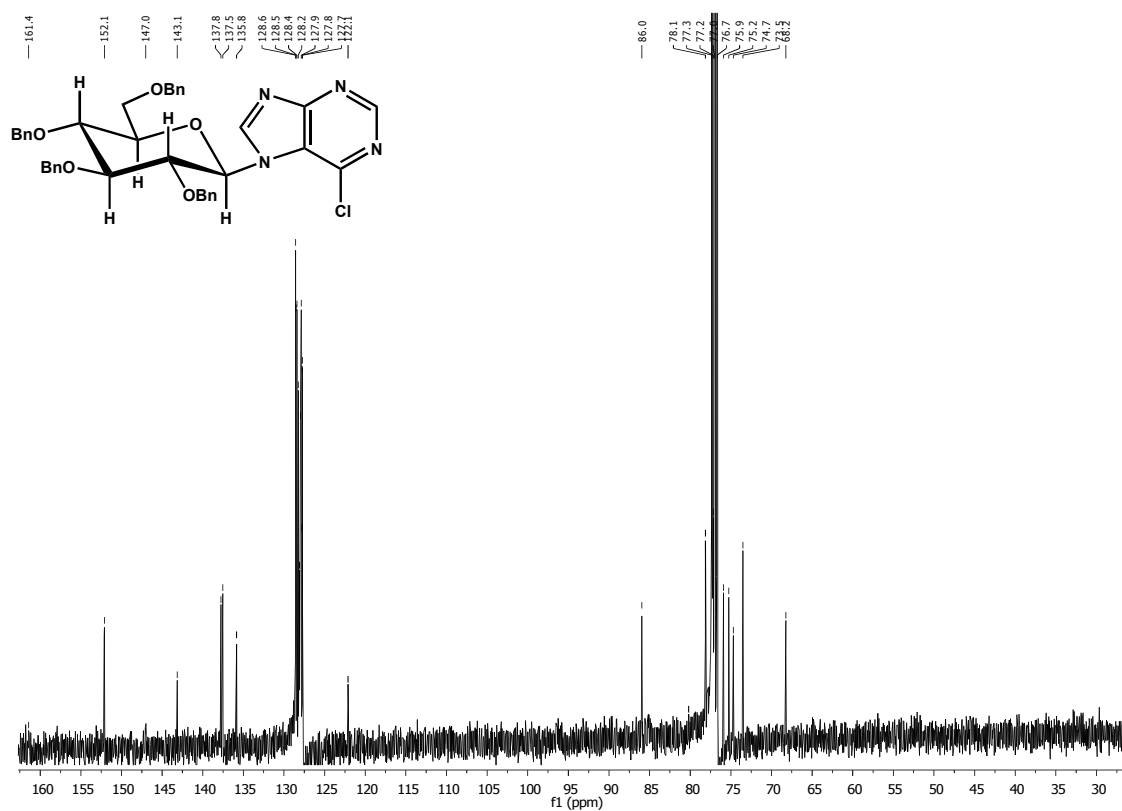

Figure S8. <sup>13</sup>C NMR spectrum of 6-Chloro-7-(2,3,4,6-tetra-*O*-benzyl-β-D-glucopyranosyl)purine (4)

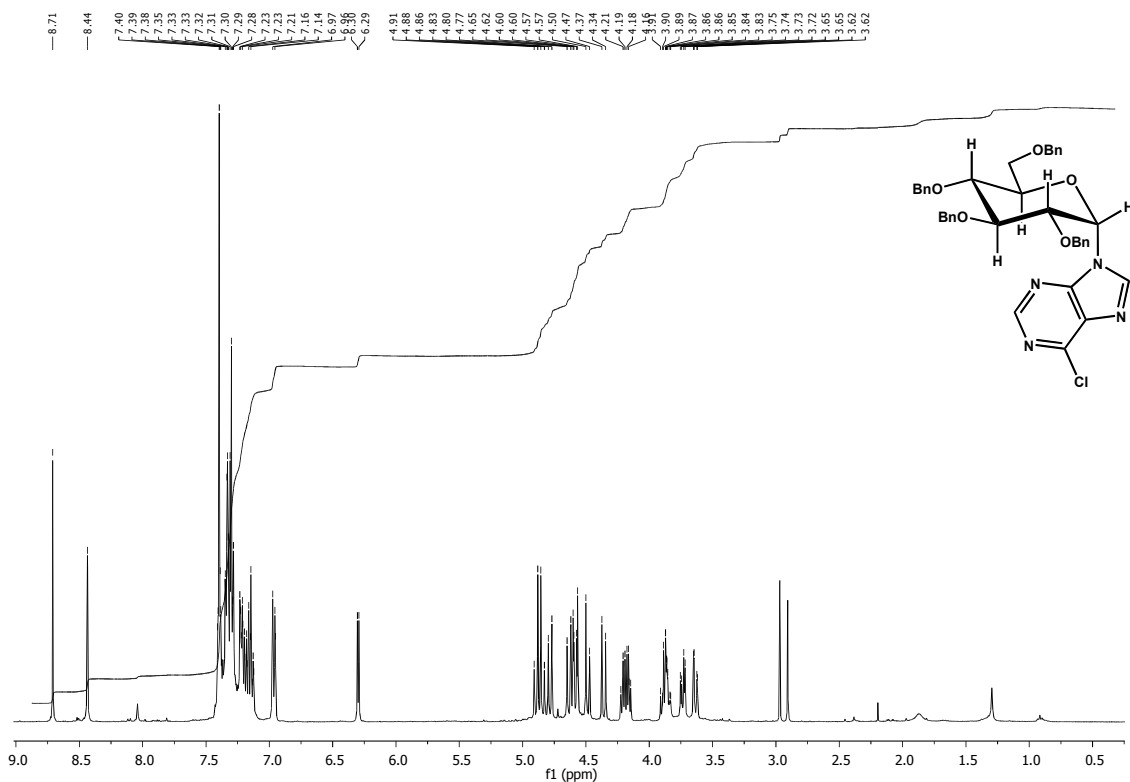

**Figure S9.**  $^1\text{H}$  NMR spectrum of 6-Chloro-9-(2,3,4,6-tetra-*O*-benzyl- $\alpha$ -D-glucopyranosyl)purine (5)

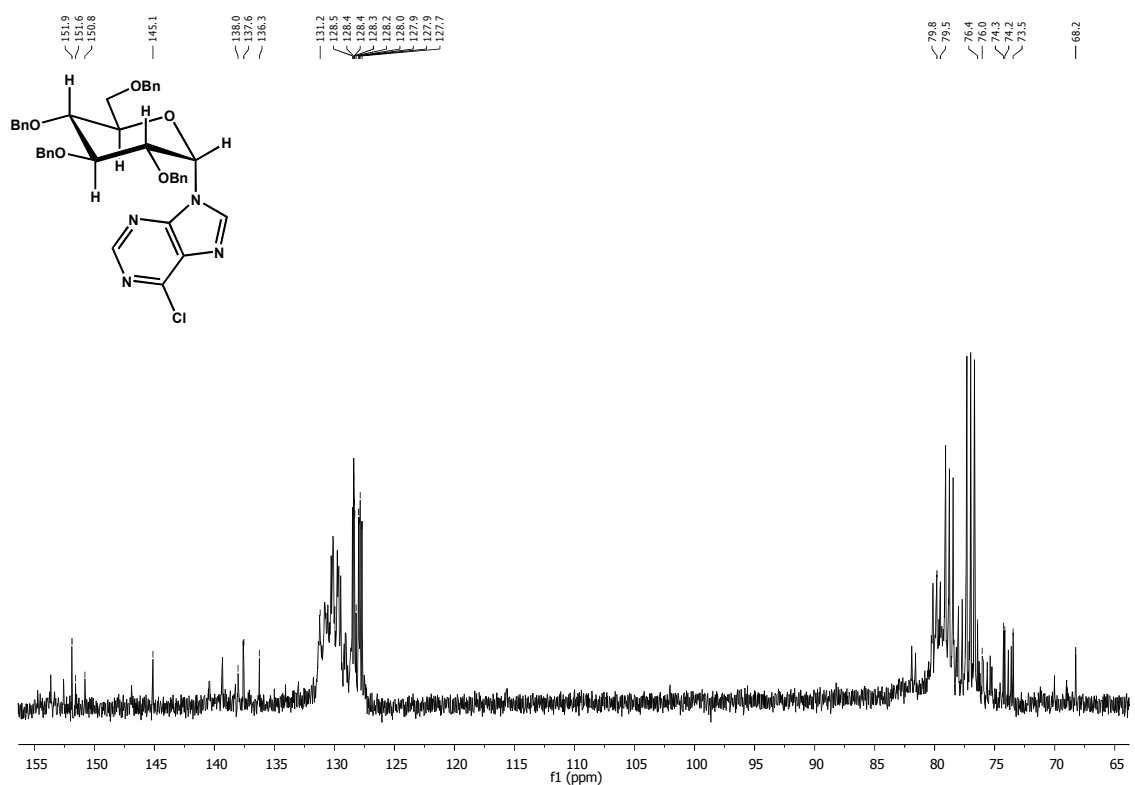

**Figure S10.**  $^{13}\text{C}$  NMR spectrum of 6-Chloro-9-(2,3,4,6-tetra-*O*-benzyl- $\alpha$ -D-glucopyranosyl)purine (5)



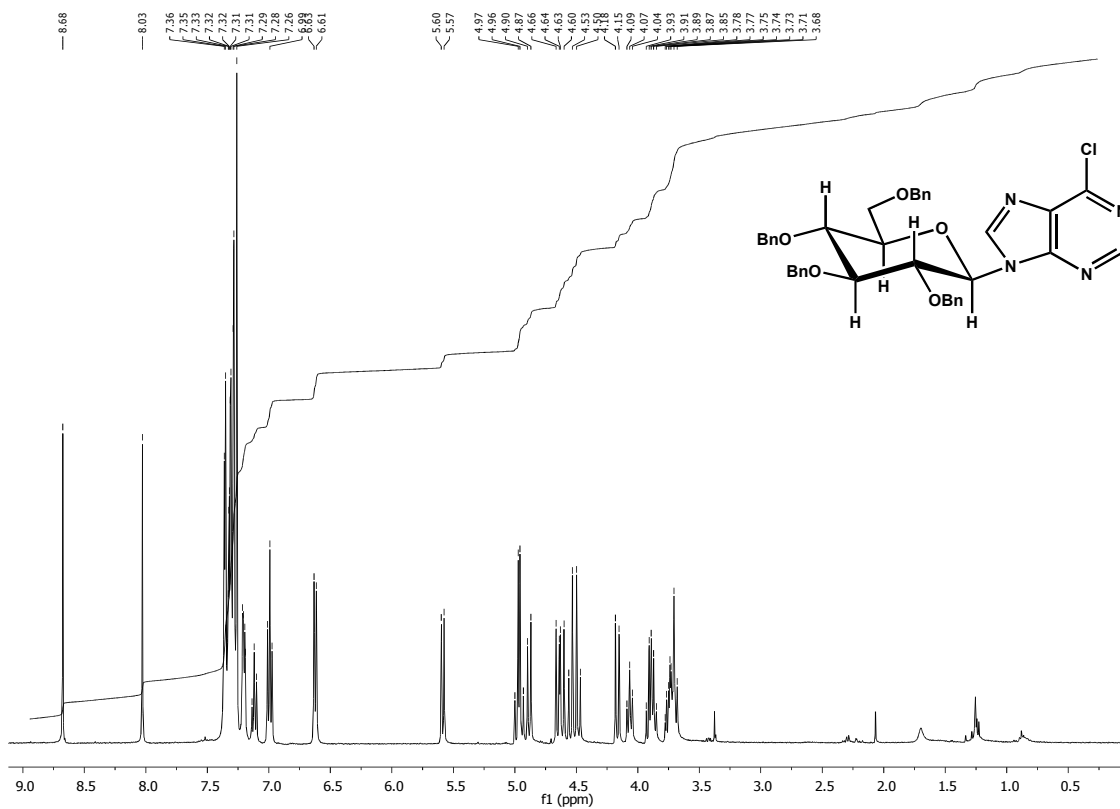

Figure S11. <sup>1</sup>H NMR spectrum of 6-Chloro-9-(2,3,4,6-tetra-*O*-benzyl-β-D-glucopyranosyl)purine (6)

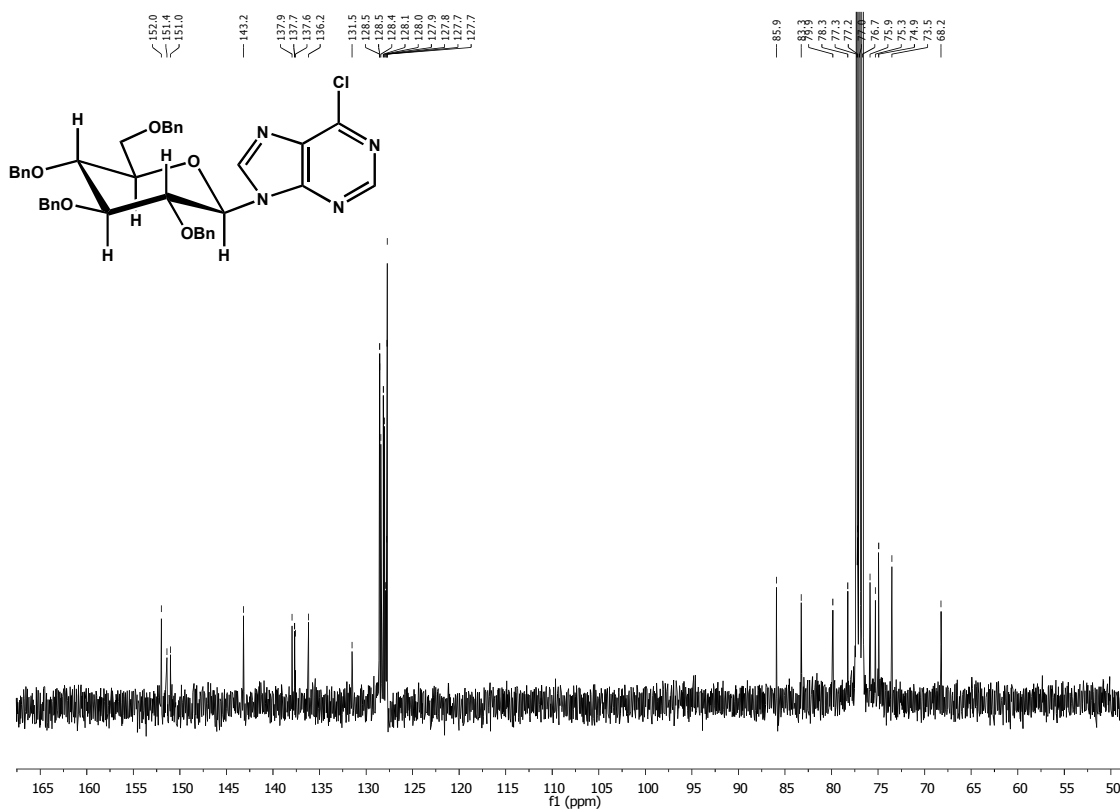

Figure S12. <sup>13</sup>C NMR spectrum of 6-Chloro-9-(2,3,4,6-tetra-*O*-benzyl-β-D-glucopyranosyl)purine (6)

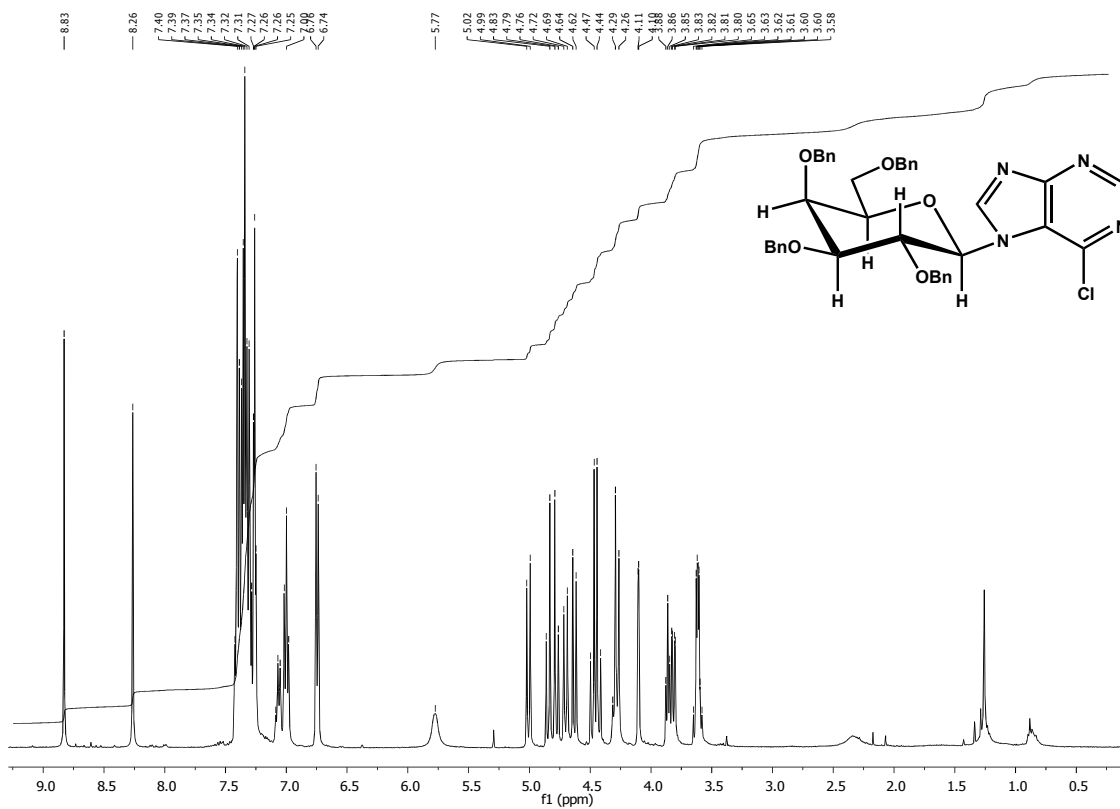

Figure S13.  $^1\text{H}$  NMR spectrum of 6-Chloro-7-(2,3,4,6-tetra-*O*-benzyl- $\beta$ -D-galactopyranosyl)purine (7)

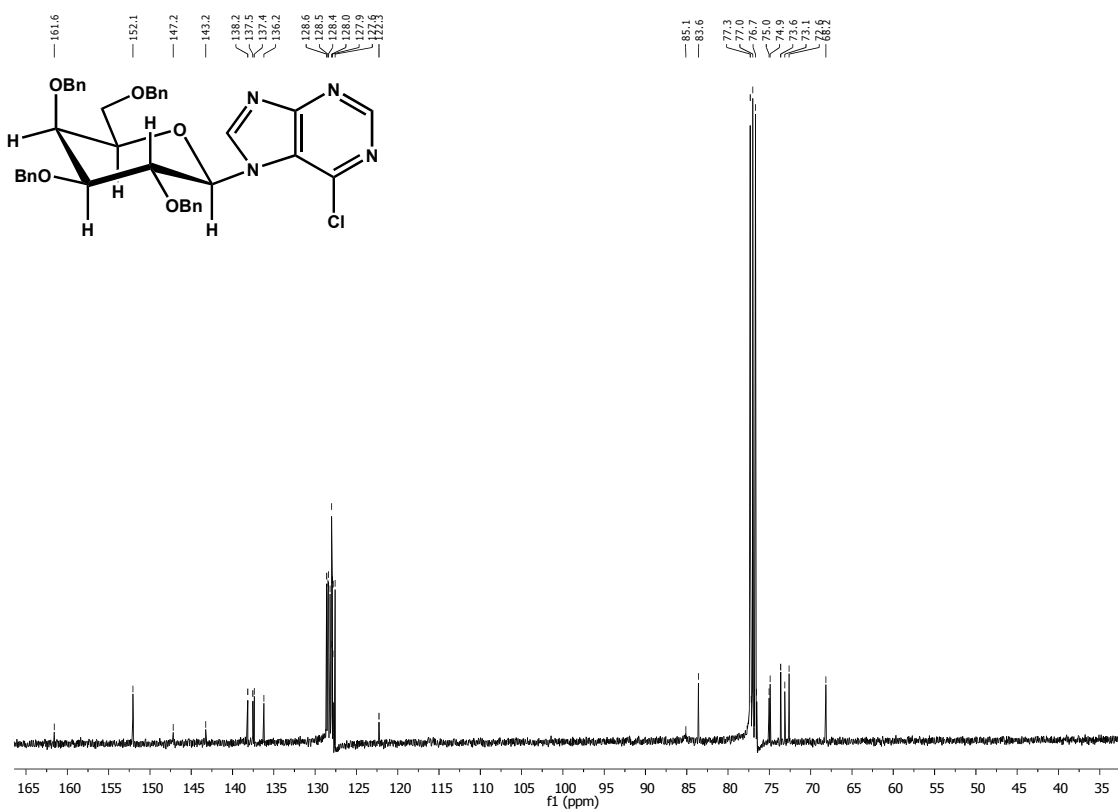

Figure S14.  $^{13}\text{C}$  NMR spectrum of 6-Chloro-7-(2,3,4,6-tetra-*O*-benzyl- $\beta$ -D-galactopyranosyl)purine (7)

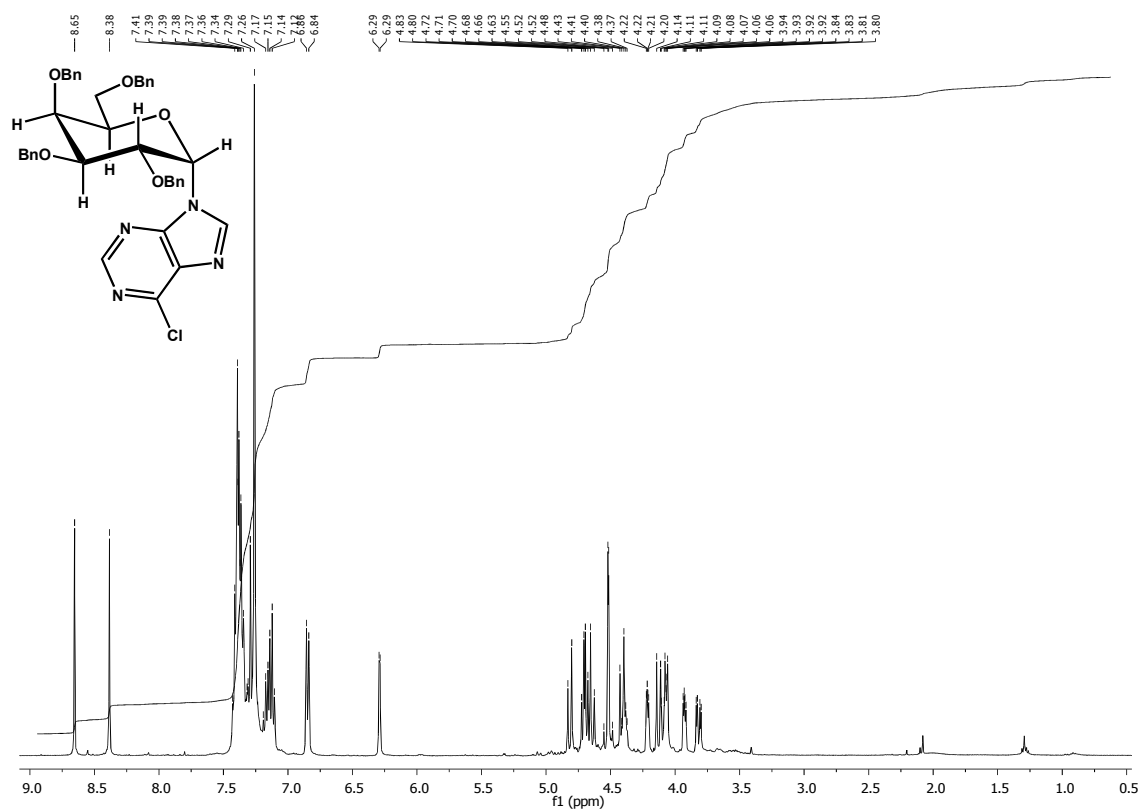

**Figure S15.**  $^1\text{H}$  NMR spectrum of 6-Chloro-9-(2,3,4,6-tetra-*O*-benzyl- $\alpha$ -D-galactopyranosyl)purine (**8**)

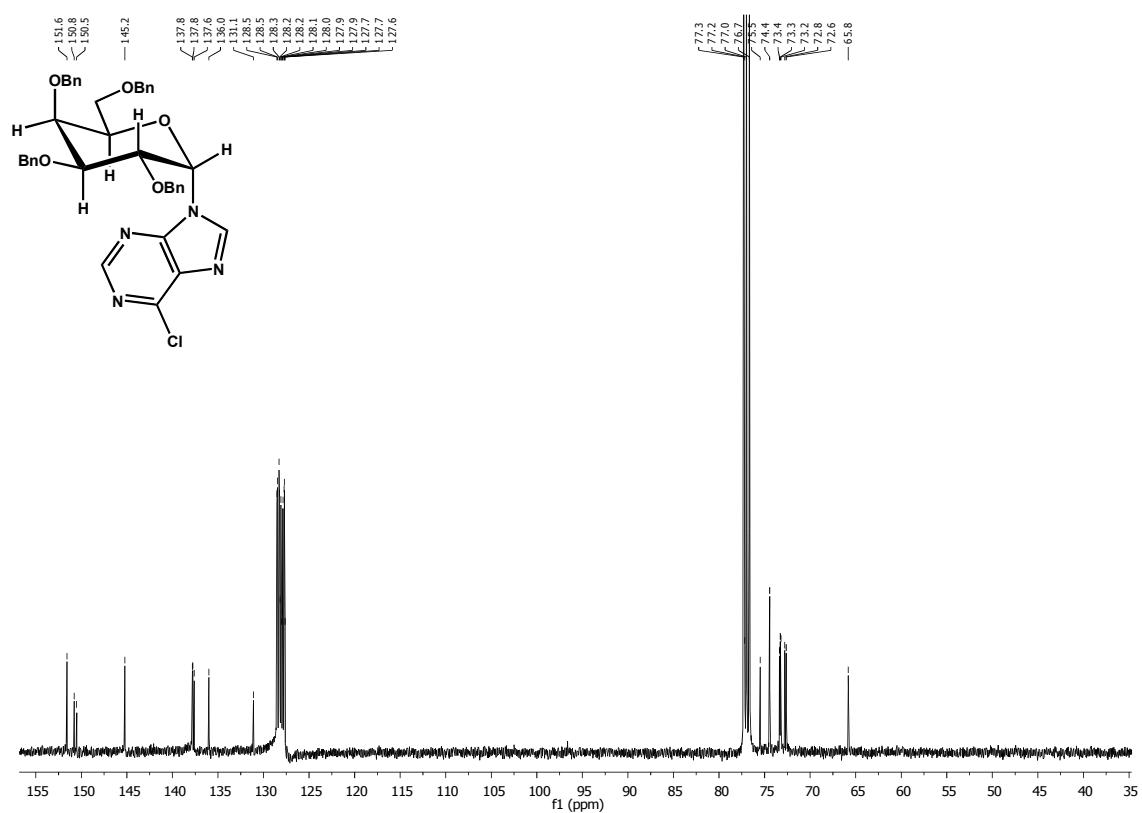

**Figure S16.**  $^{13}\text{C}$  NMR spectrum of 6-Chloro-9-(2,3,4,6-tetra-*O*-benzyl- $\alpha$ -D-galactopyranosyl)purine (**8**)

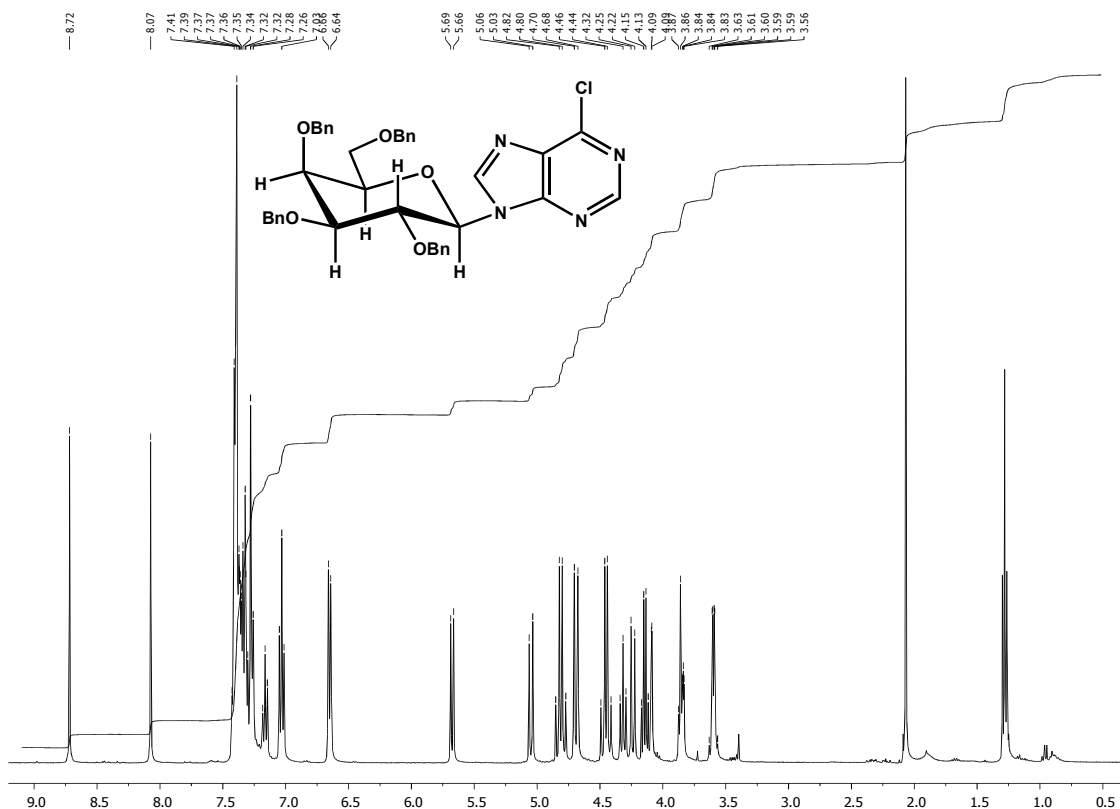

Figure S17. <sup>1</sup>H NMR spectrum of 6-Chloro-9-(2,3,4,6-tetra-*O*-benzyl-β-D-galactopyranosyl)purine (9)

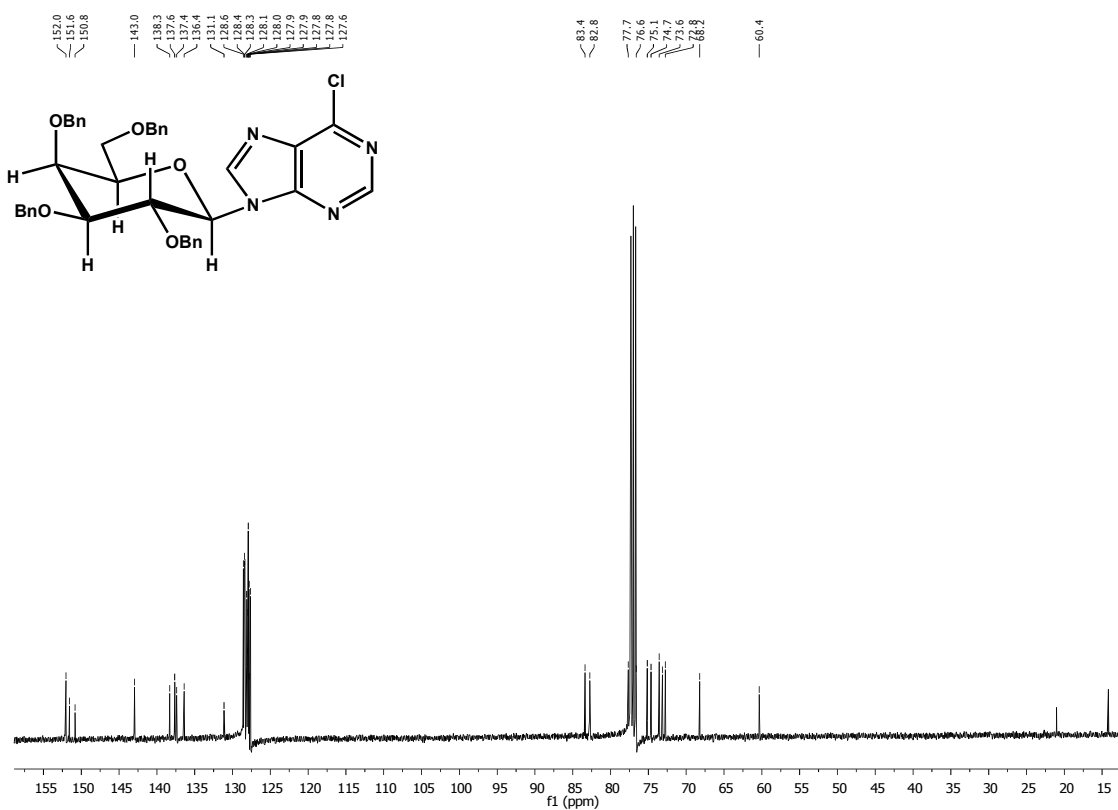

Figure S18. <sup>13</sup>C NMR spectrum of 6-Chloro-9-(2,3,4,6-tetra-*O*-benzyl-β-D-galactopyranosyl)purine (9)

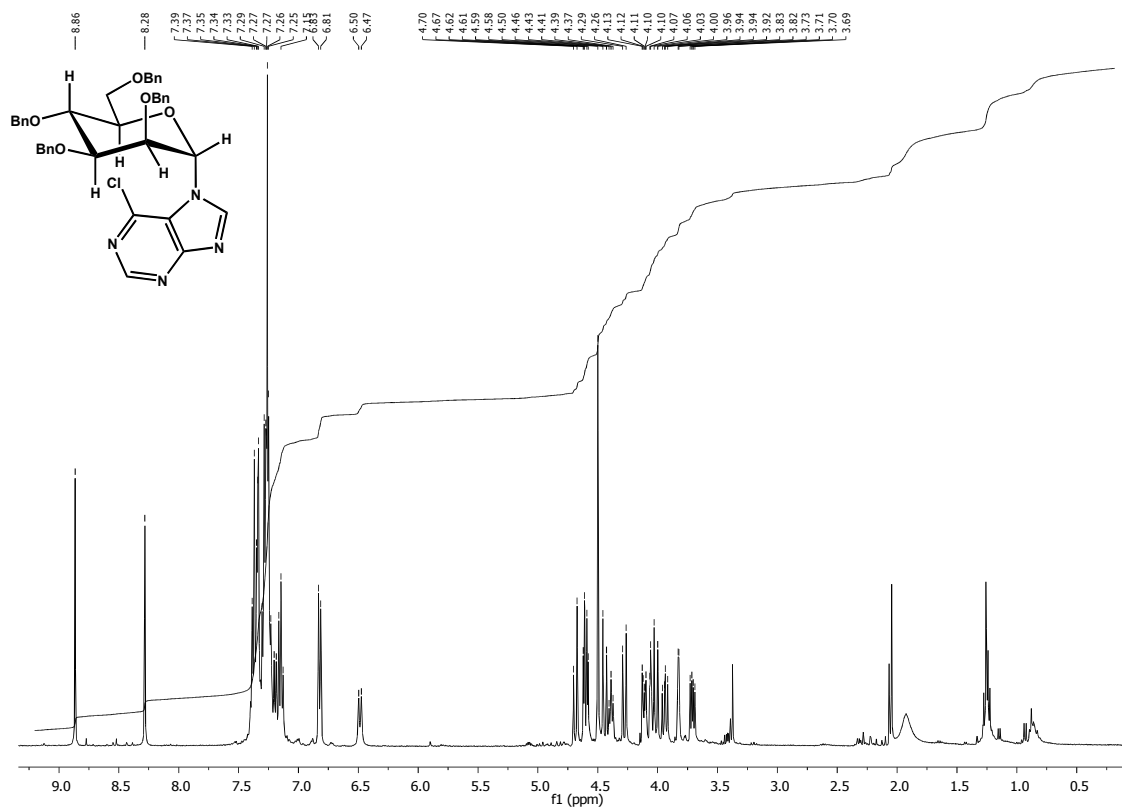

**Figure S19.**  $^1\text{H}$  NMR spectrum of 6-Chloro-7-(2,3,4,6-tetra-*O*-benzyl- $\alpha$ -D-mannopyranosyl)purine (**10**)

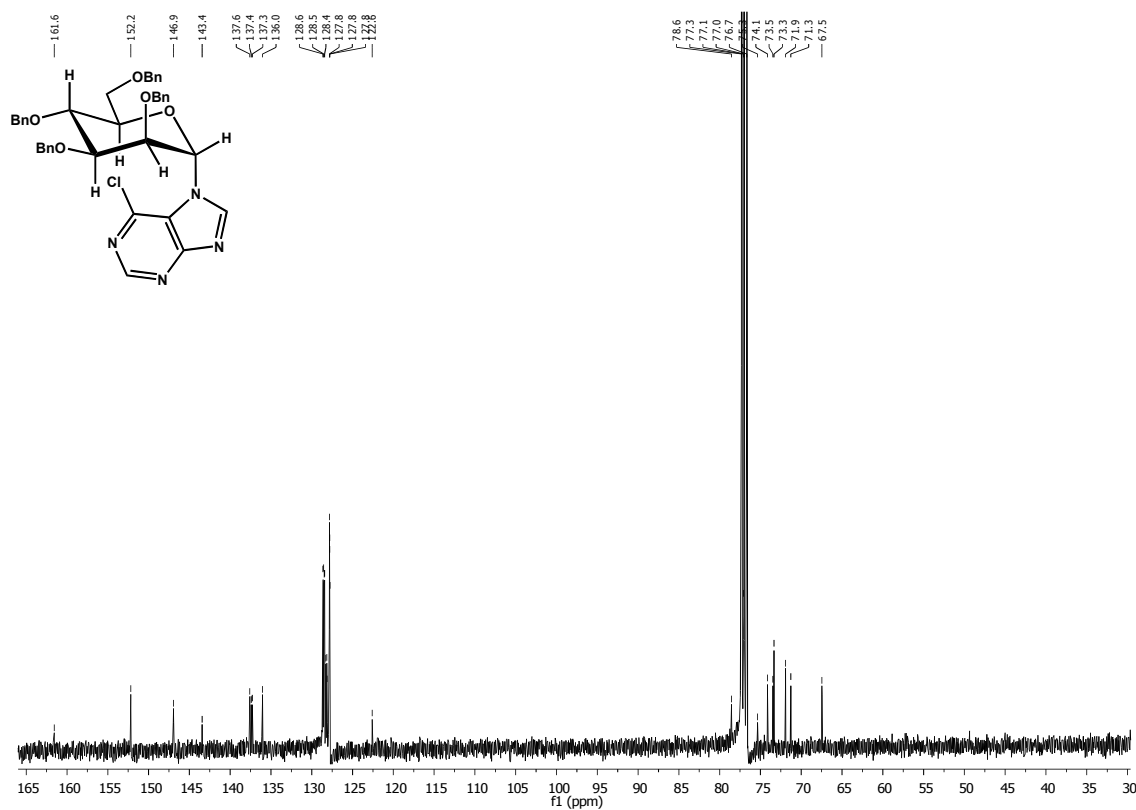

**Figure S20.**  $^{13}\text{C}$  NMR spectrum of 6-Chloro-7-(2,3,4,6-tetra-*O*-benzyl- $\alpha$ -D-mannopyranosyl)purine (**10**)

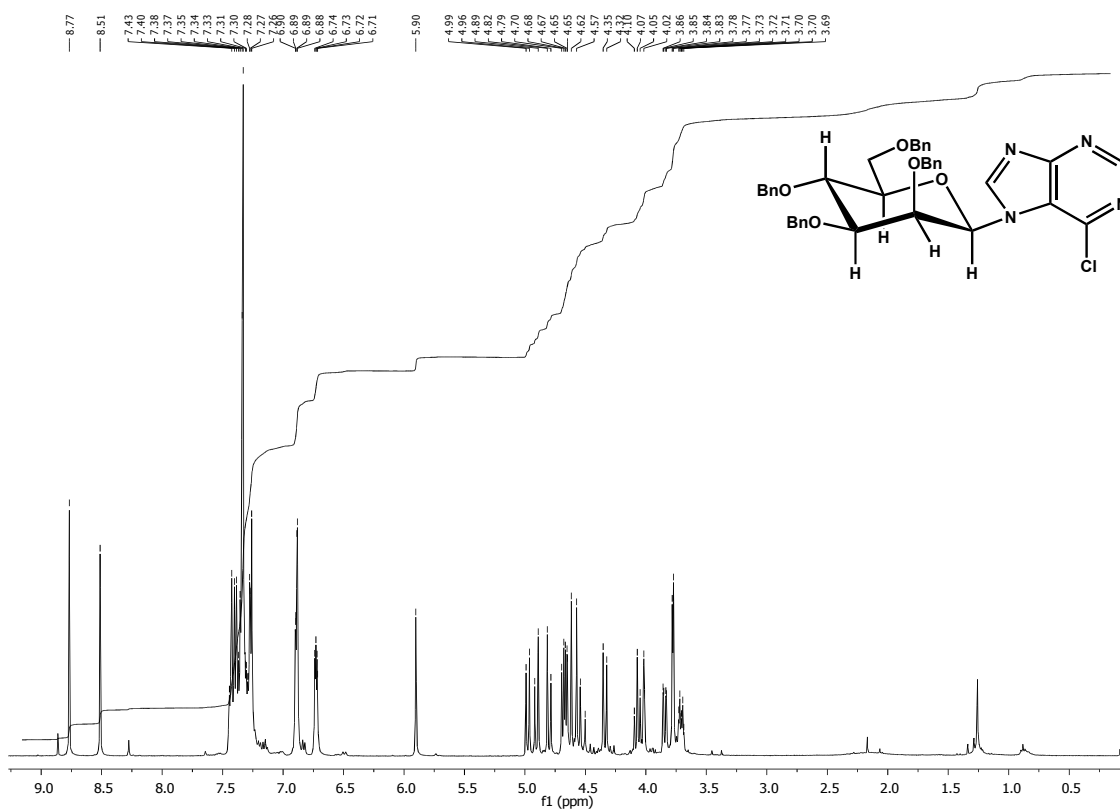

Figure S21. <sup>1</sup>H NMR spectrum of 6-Chloro-7-(2,3,4,6-tetra-*O*-benzyl-β-D-mannopyranosyl)purine (11)

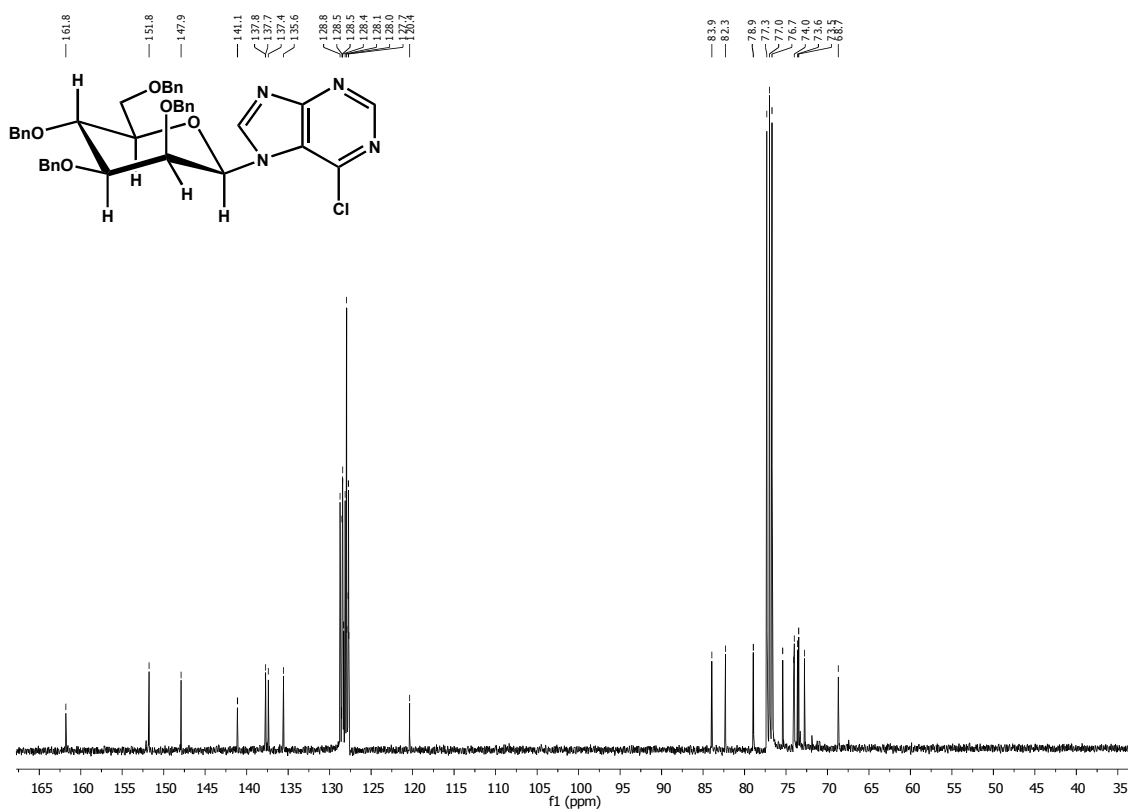

Figure S22. <sup>13</sup>C NMR spectrum of 6-Chloro-7-(2,3,4,6-tetra-*O*-benzyl-β-D-mannopyranosyl)purine (11)

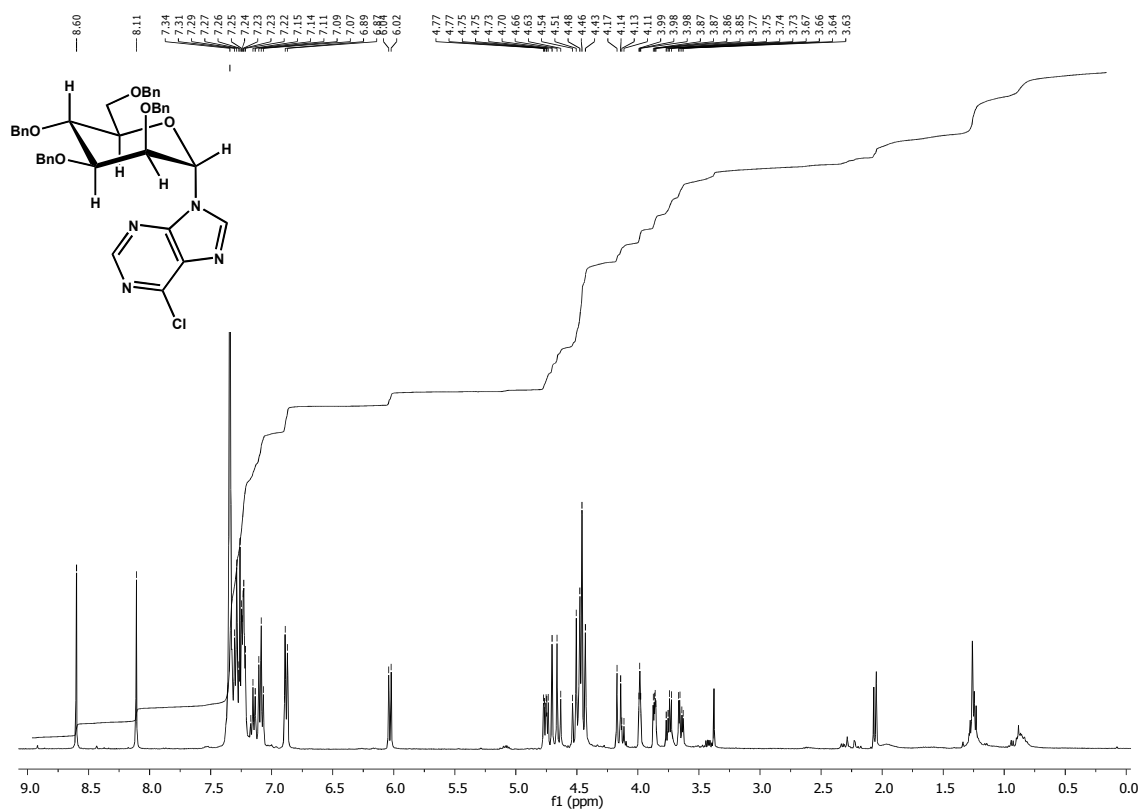

**Figure S23.**  $^1\text{H}$  NMR spectrum of 6-Chloro-9-(2,3,4,6-tetra-*O*-benzyl- $\alpha$ -D-mannopyranosyl)purine (12)

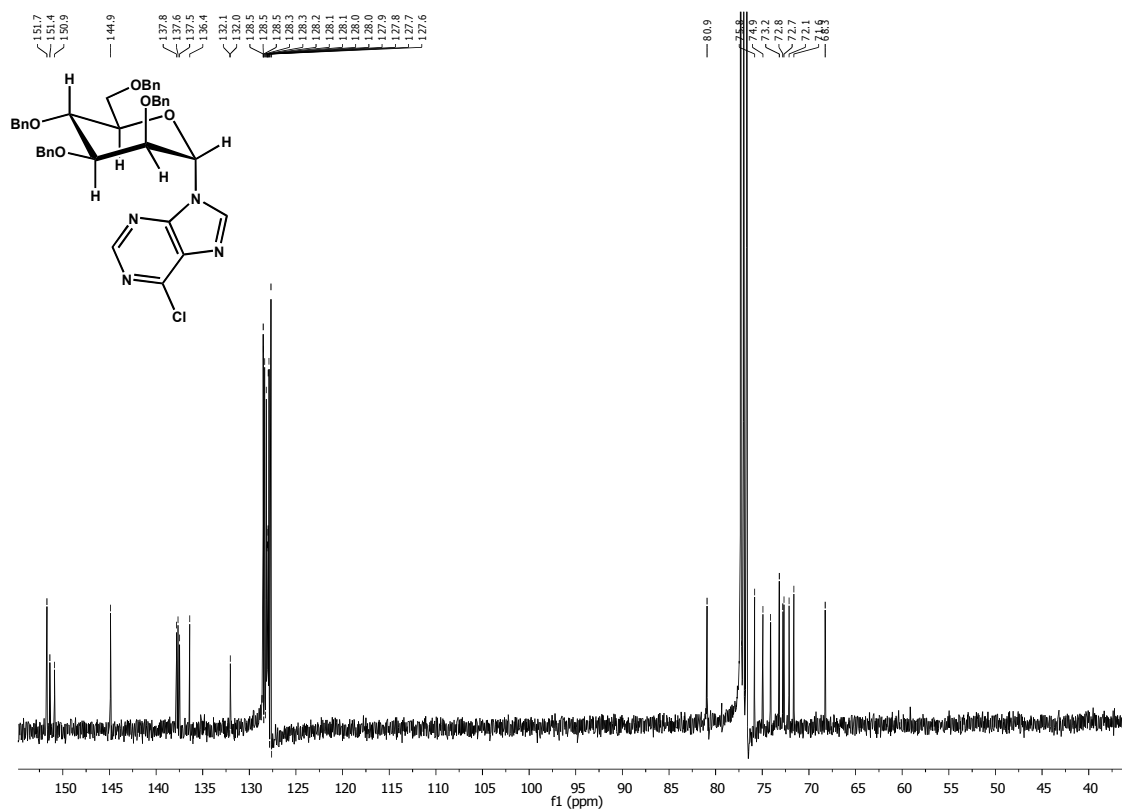

**Figure S24.**  $^{13}\text{C}$  NMR spectrum of 6-Chloro-9-(2,3,4,6-tetra-*O*-benzyl- $\alpha$ -D-mannopyranosyl)purine (12)

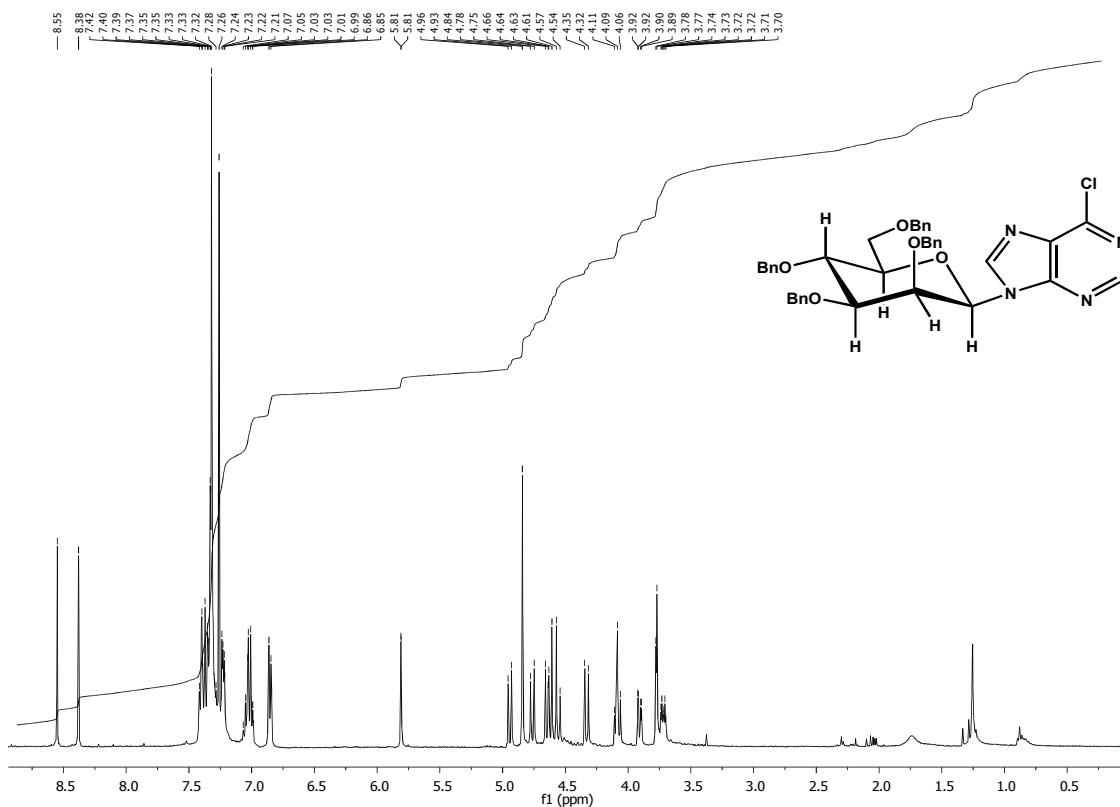

Figure S25. <sup>1</sup>H NMR spectrum of 6-Chloro-9-(2,3,4,6-tetra-*O*-benzyl-β-D-mannopyranosyl)purine (13)

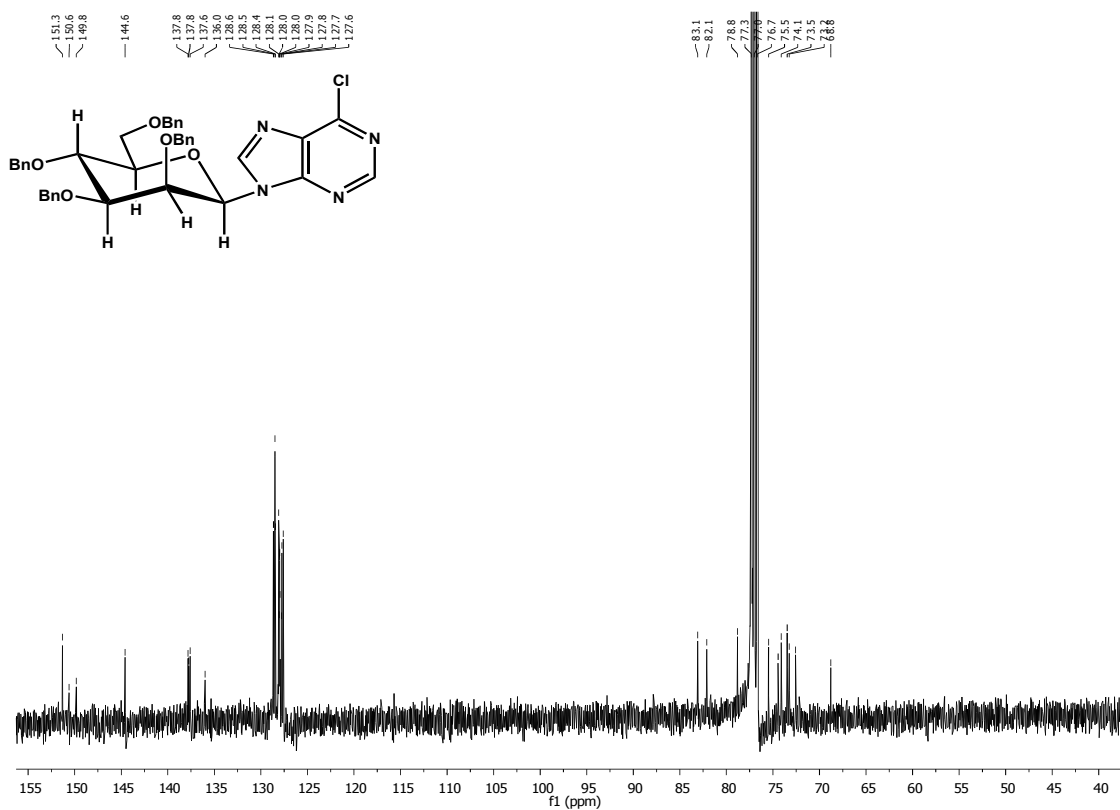

Figure S26. <sup>13</sup>C NMR spectrum of 6-Chloro-9-(2,3,4,6-tetra-*O*-benzyl-β-D-mannopyranosyl)purine (13)



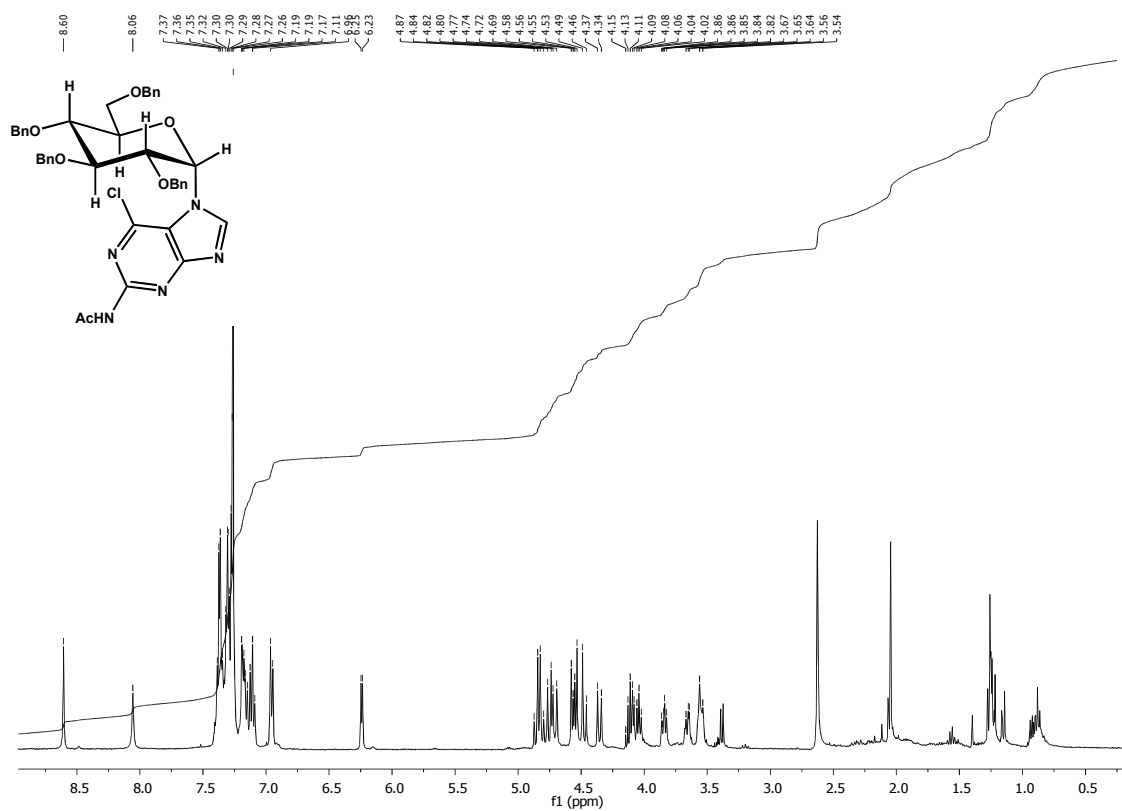

Figure S27.  $^1\text{H}$  NMR spectrum of 2-(Acetylamino)-6-chloro-7-(2,3,4,6-tetra-*O*-benzyl- $\alpha$ -D-glucopyranosyl)purine (14)

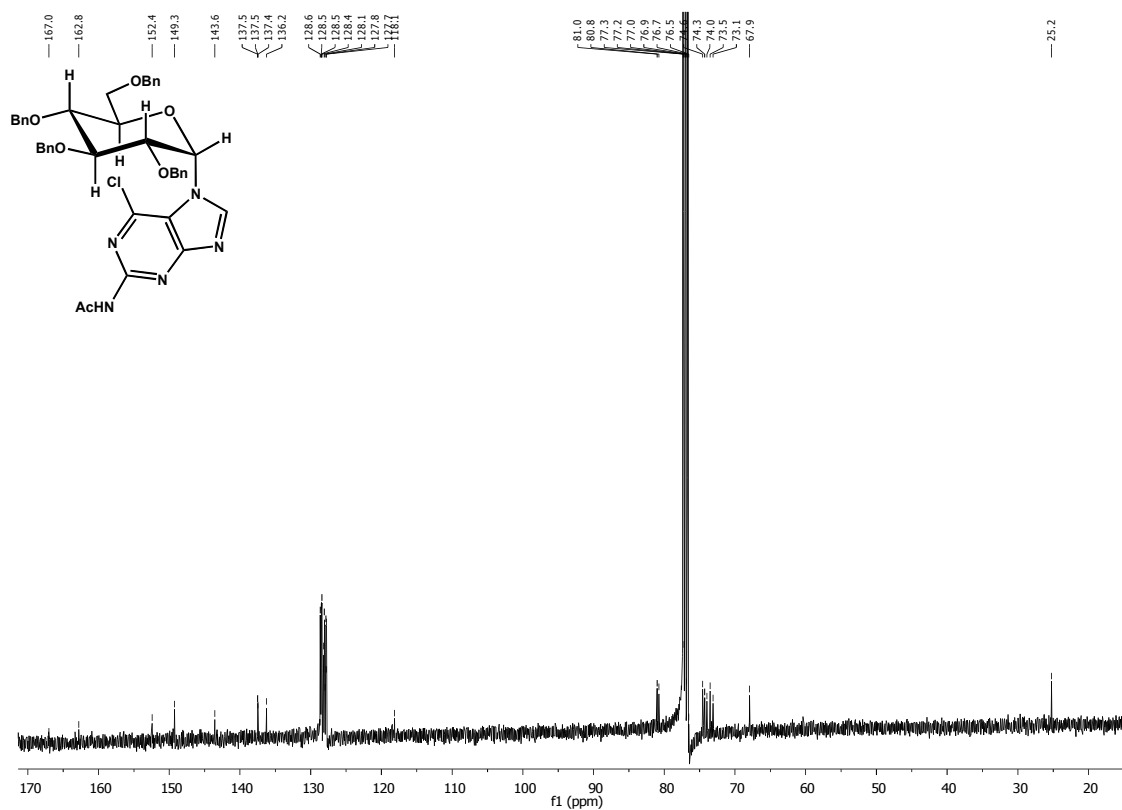

Figure S28.  $^{13}\text{C}$  NMR spectrum of 2-(Acetylamino)-6-chloro-7-(2,3,4,6-tetra-*O*-benzyl- $\alpha$ -D-glucopyranosyl)purine (14)

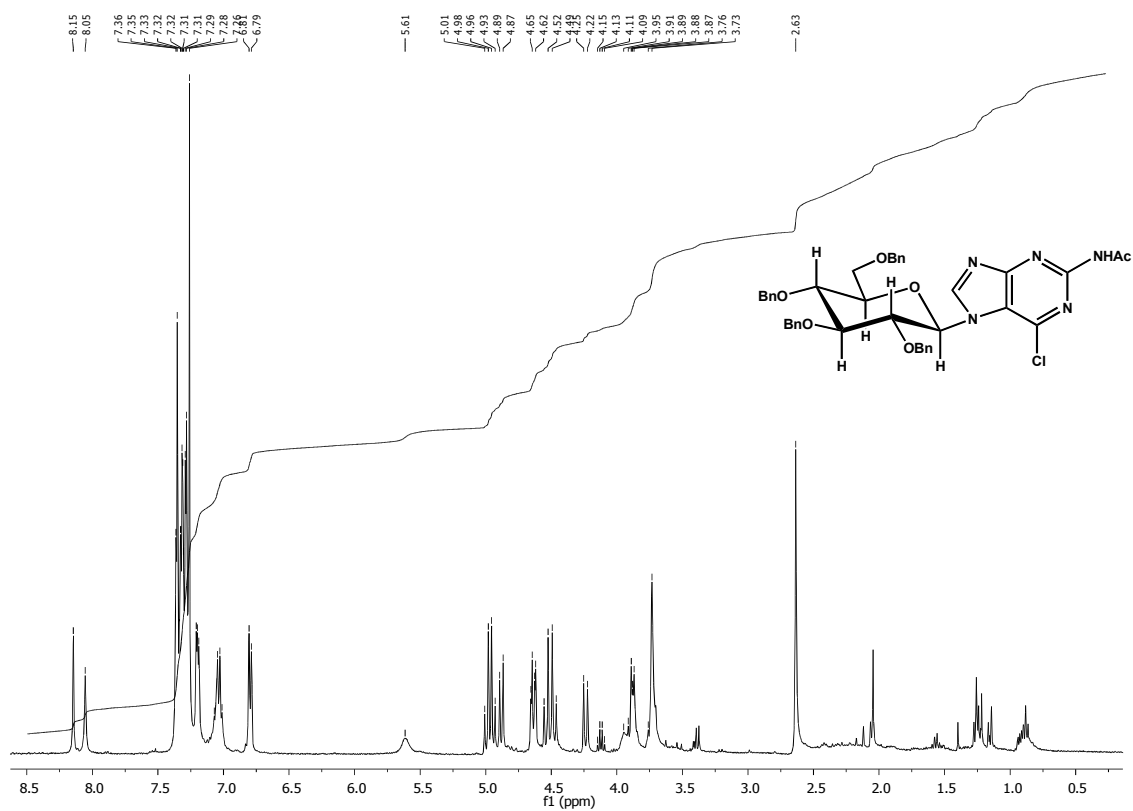

**Figure S29.** <sup>1</sup>H NMR spectrum of 2-(Acetylamino)-6-chloro-7-(2,3,4,6-tetra-*O*-benzyl-β-D-glucopyranosyl)purine (15)

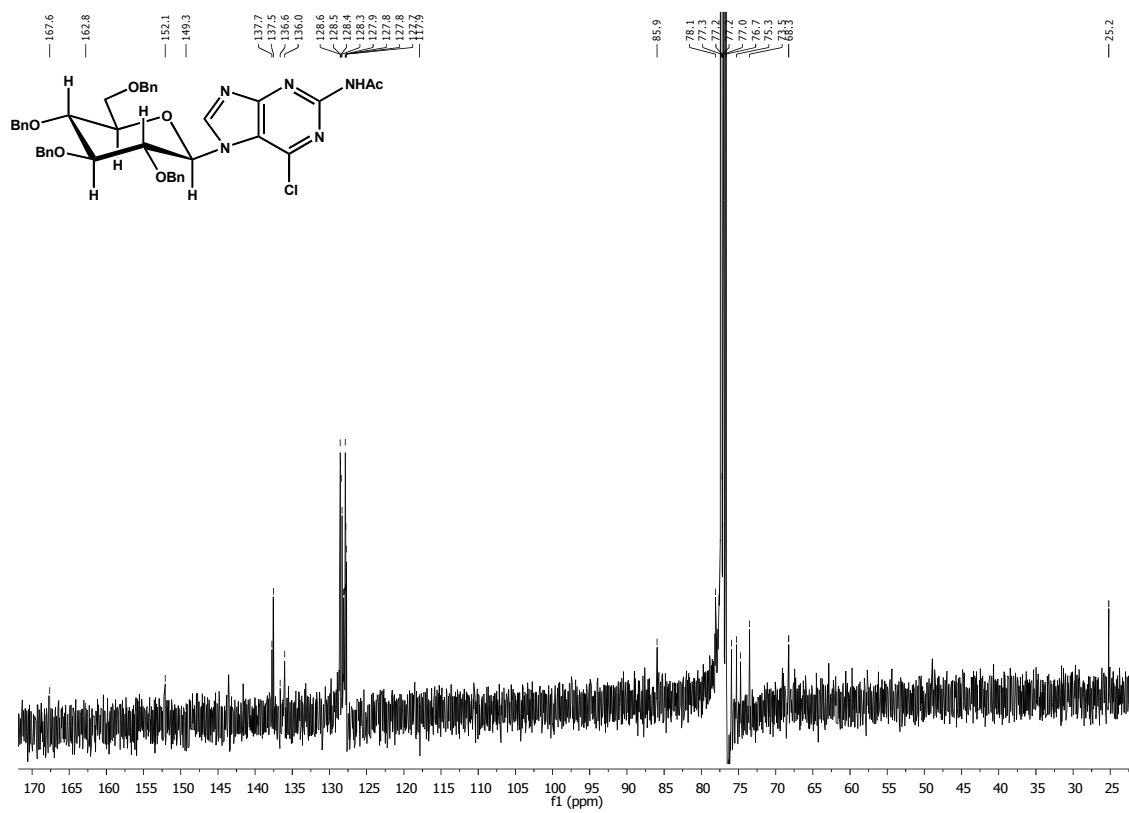

**Figure S30.** <sup>13</sup>C NMR spectrum of 2-(Acetylamino)-6-chloro-7-(2,3,4,6-tetra-*O*-benzyl-β-D-glucopyranosyl)purine (15)

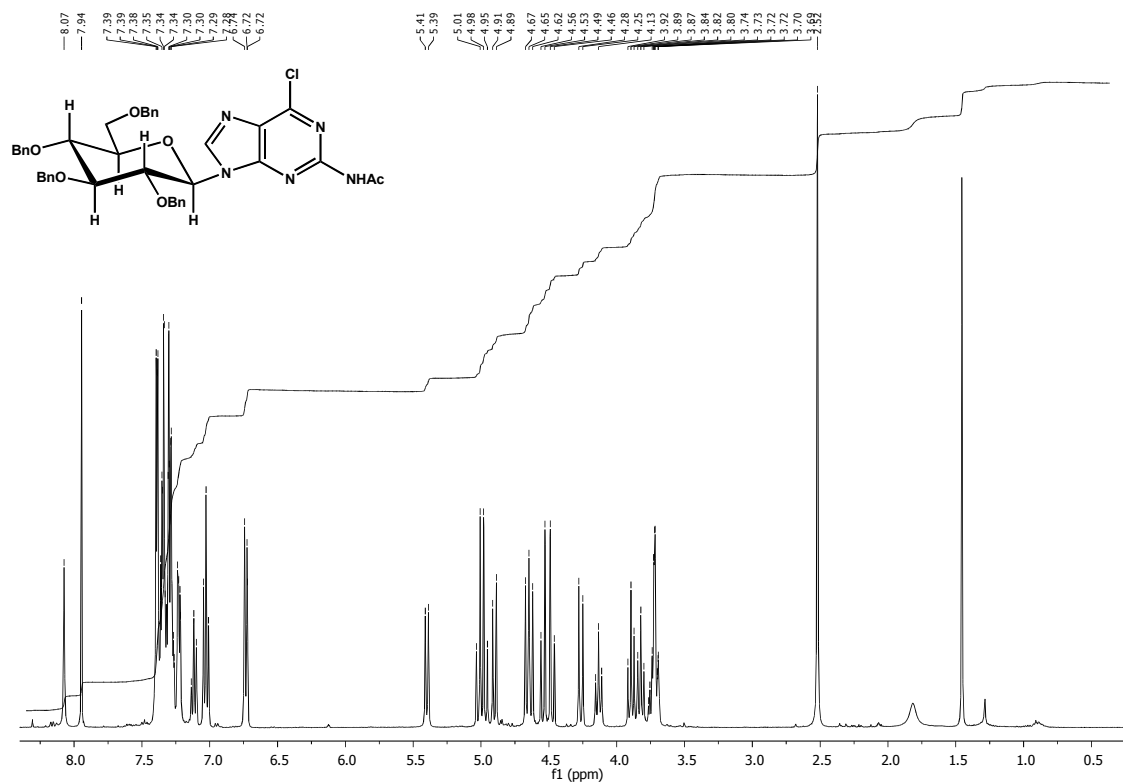

Figure S31. <sup>1</sup>H NMR spectrum of 2-(Acetylamino)-6-chloro-9-(2,3,4,6-tetra-*O*-benzyl-β-D-glucopyranosyl)purine (16)

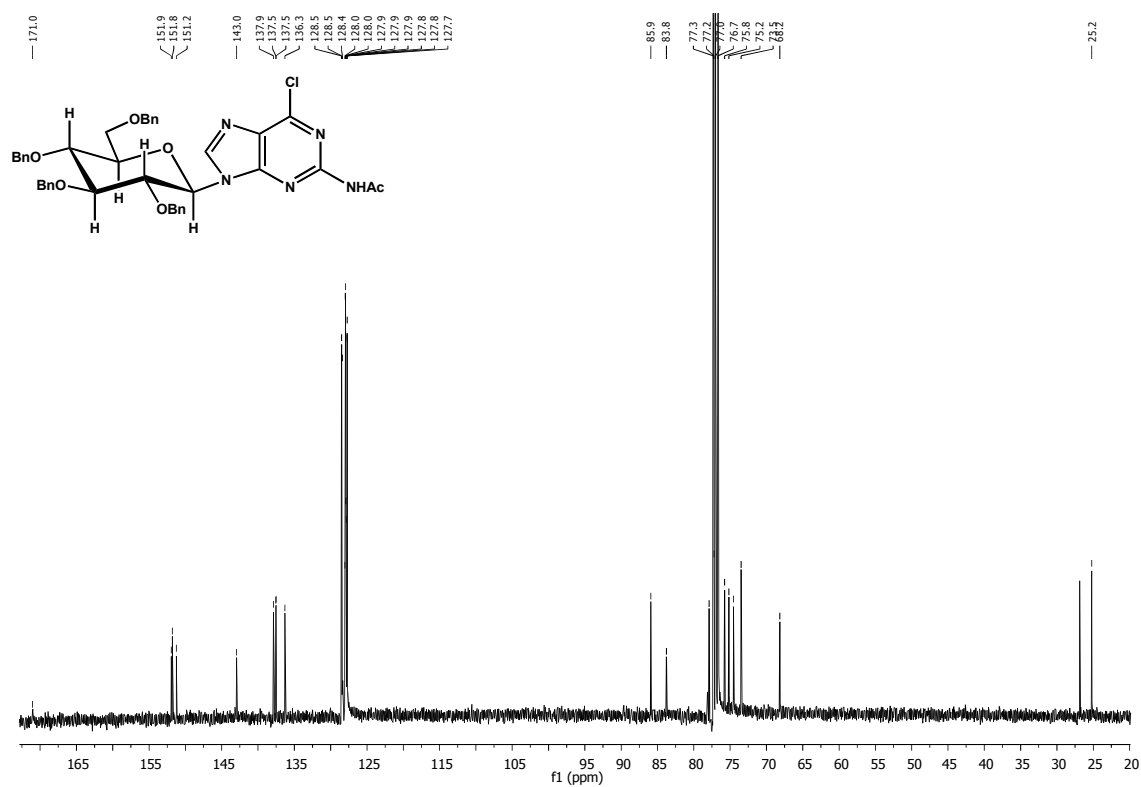

Figure S32. <sup>13</sup>C NMR spectrum of 2-(Acetylamino)-6-chloro-9-(2,3,4,6-tetra-*O*-benzyl-β-D-glucopyranosyl)purine (16)

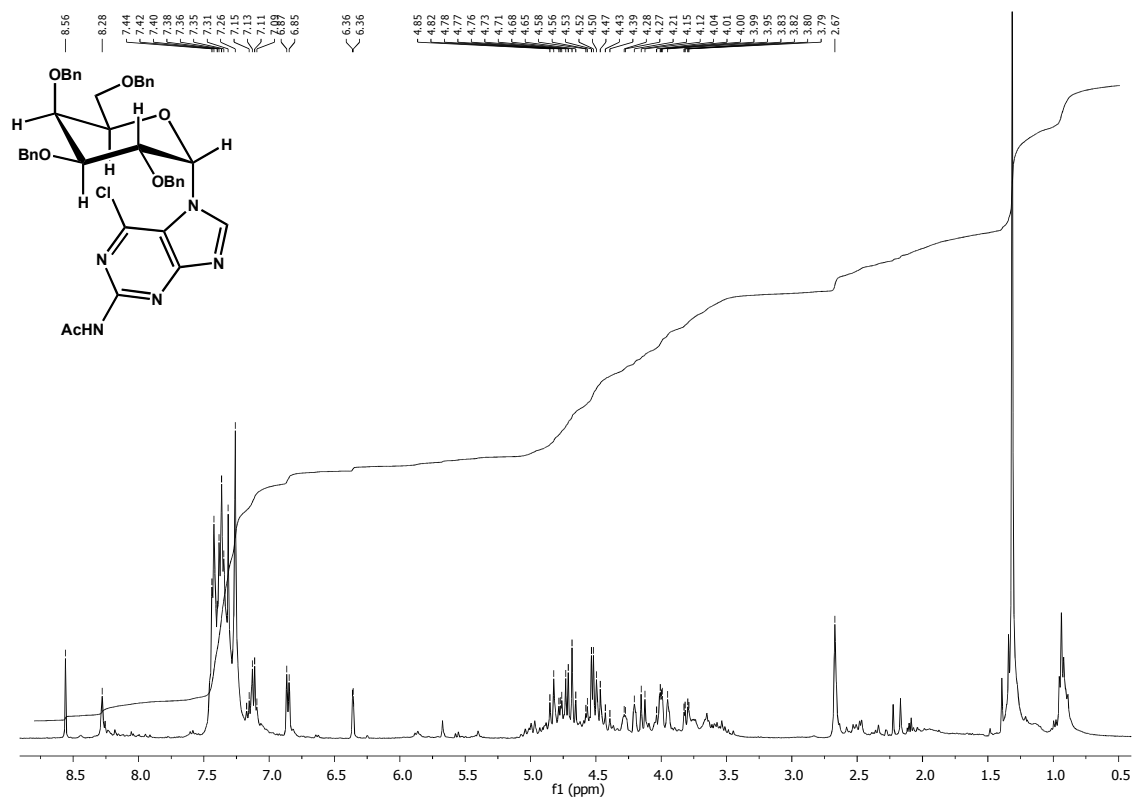

**Figure S33.**  $^1\text{H}$  NMR spectrum of 2-(Acetylamino)-6-chloro-7-(2,3,4,6-tetra-*O*-benzyl- $\alpha$ -D-galactopyranosyl)purine (17)

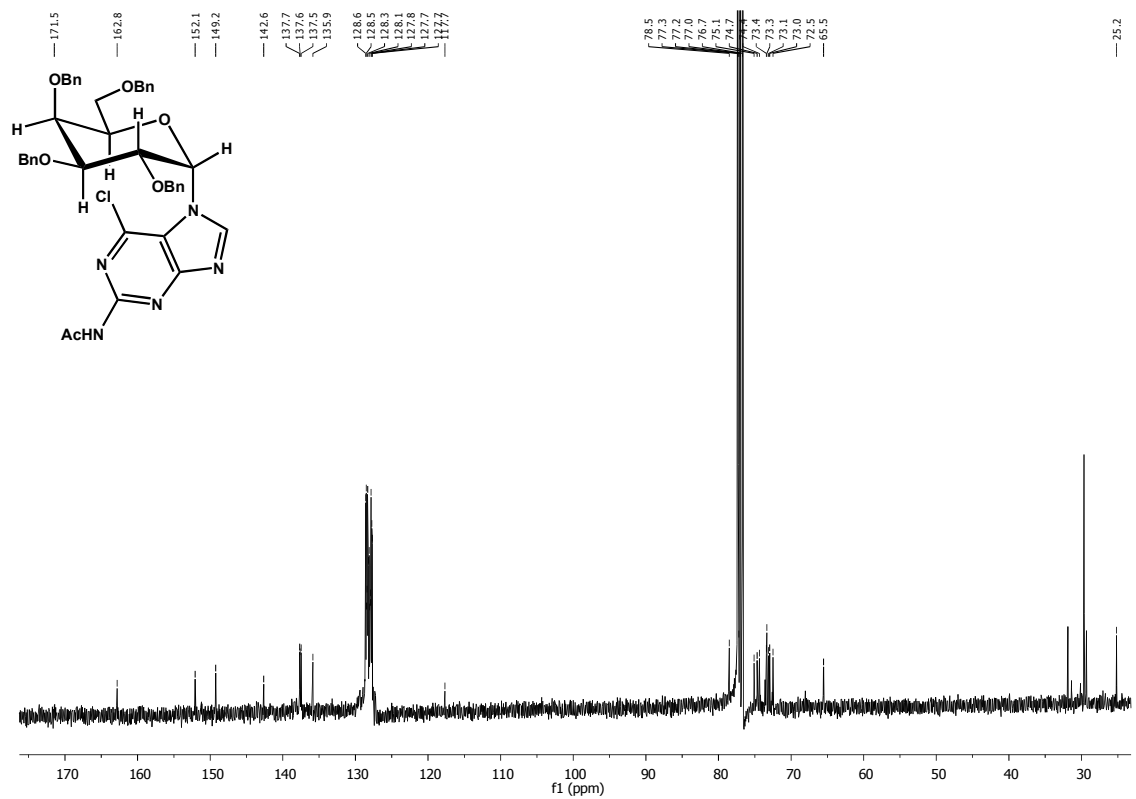

**Figure S34.**  $^{13}\text{C}$  NMR spectrum of 2-(Acetylamino)-6-chloro-7-(2,3,4,6-tetra-*O*-benzyl- $\alpha$ -D-galactopyranosyl)purine (17)

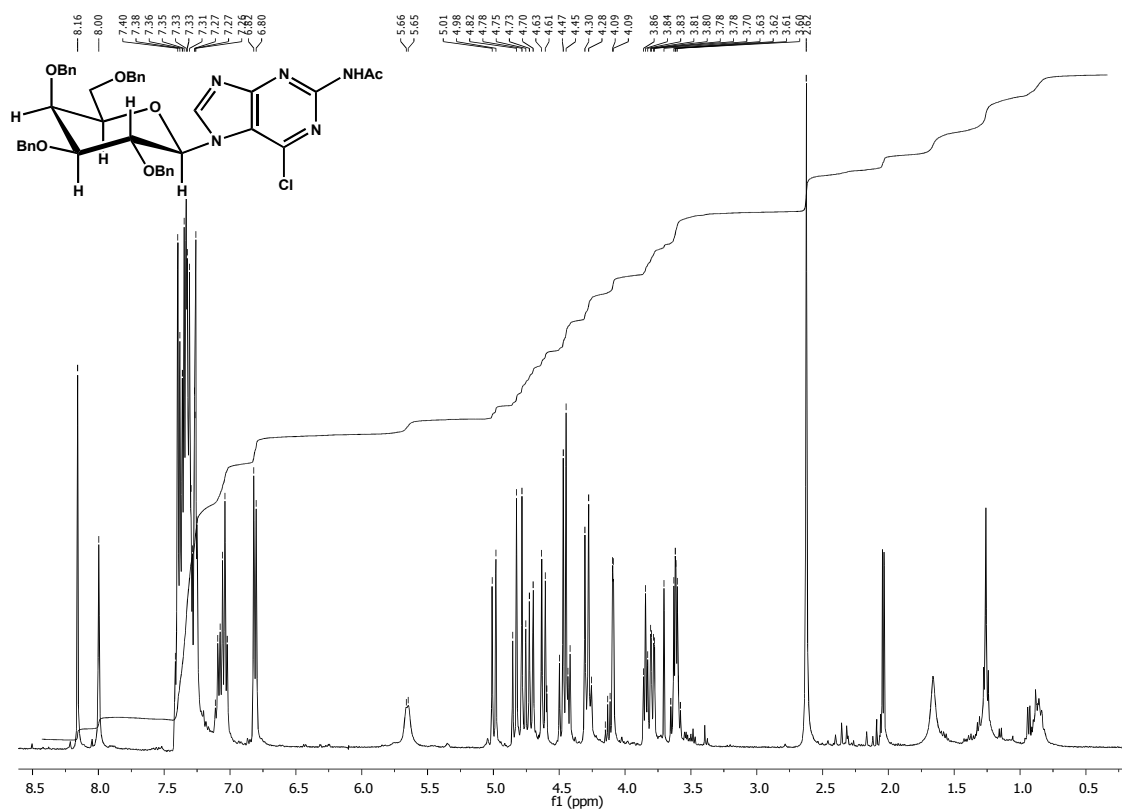

**Figure S35.**  $^1\text{H}$  NMR spectrum of 2-(Acetylamino)-6-chloro-7-(2,3,4,6-tetra-*O*-benzyl- $\beta$ -D-galactopyranosyl)purine (18)

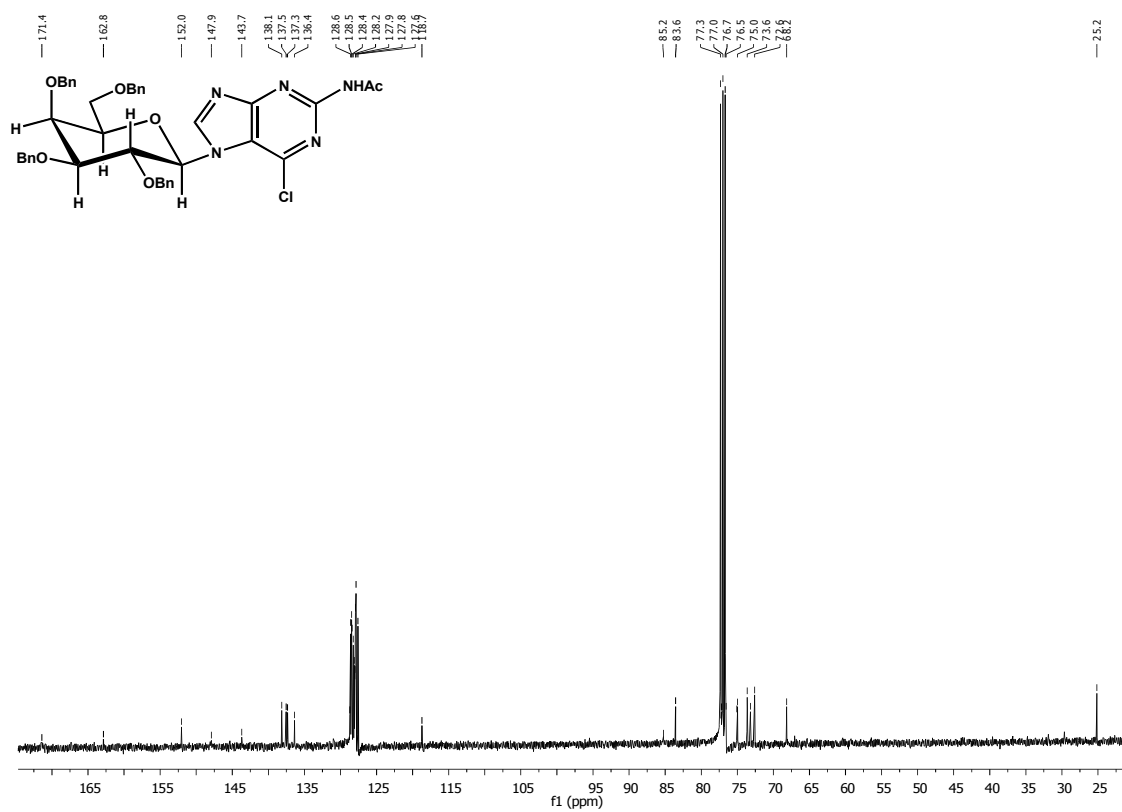

**Figure S36.**  $^{13}\text{C}$  NMR spectrum of 2-(Acetylamino)-6-chloro-7-(2,3,4,6-tetra-*O*-benzyl- $\beta$ -D-galactopyranosyl)purine (18)

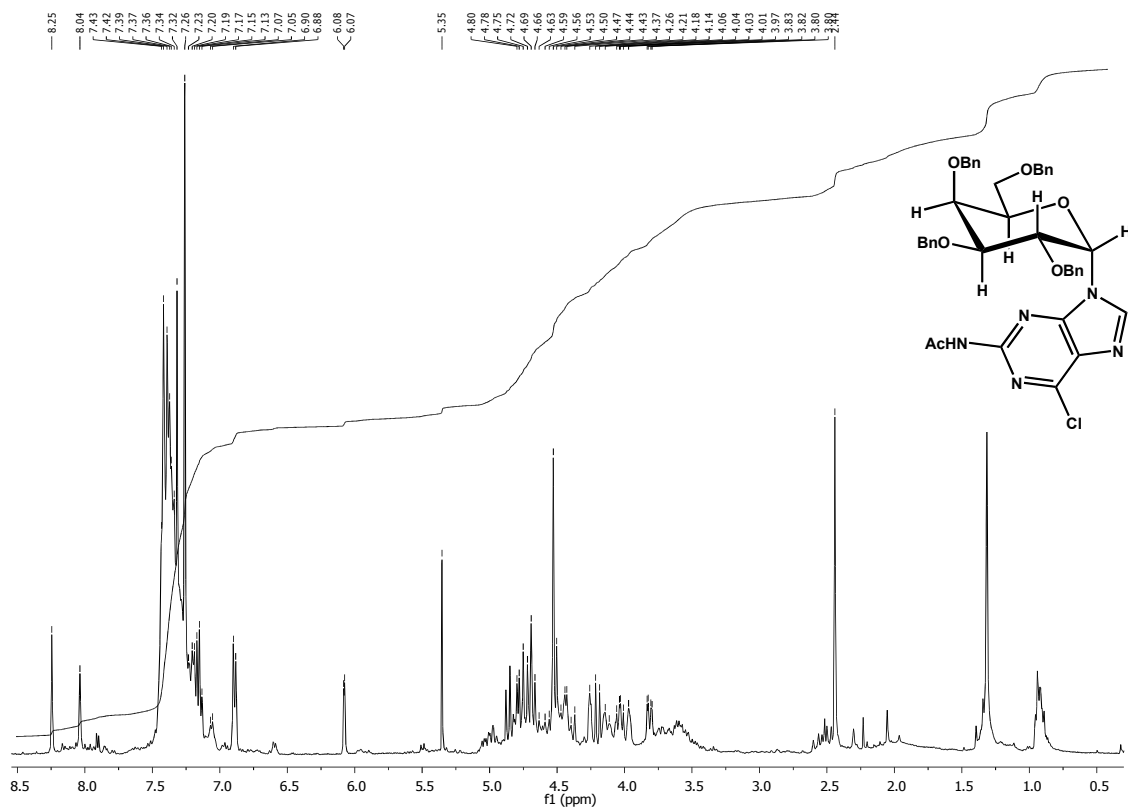

**Figure S37.**  $^1\text{H}$  NMR spectrum of 2-(Acetylamino)-6-chloro-9-(2,3,4,6-tetra-*O*-benzyl- $\alpha$ -D-galactopyranosyl)purine (19)

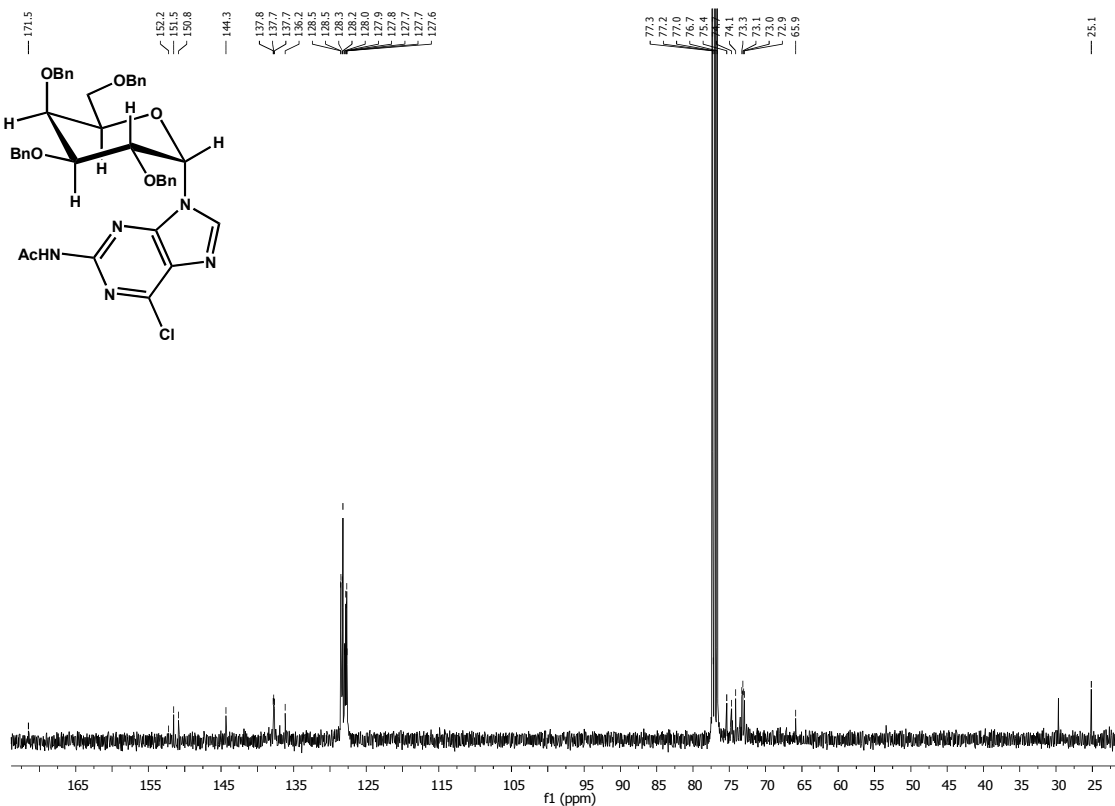

**Figure S38.**  $^{13}\text{C}$  NMR spectrum of 2-(Acetylamino)-6-chloro-9-(2,3,4,6-tetra-*O*-benzyl- $\alpha$ -D-galactopyranosyl)purine (19)

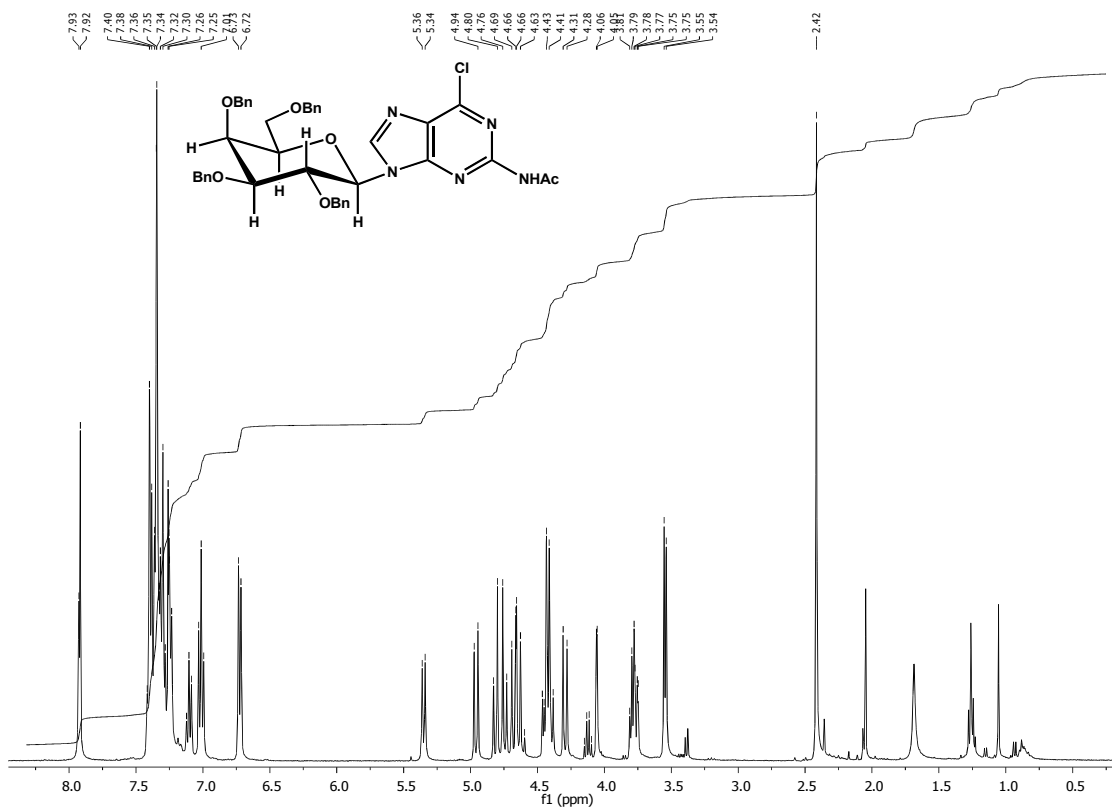

**Figure S39.** <sup>1</sup>H NMR spectrum of 2-(Acetylamino)-6-chloro-9-(2,3,4,6-tetra-*O*-benzyl-β-D-galactopyranosyl)purine (20)

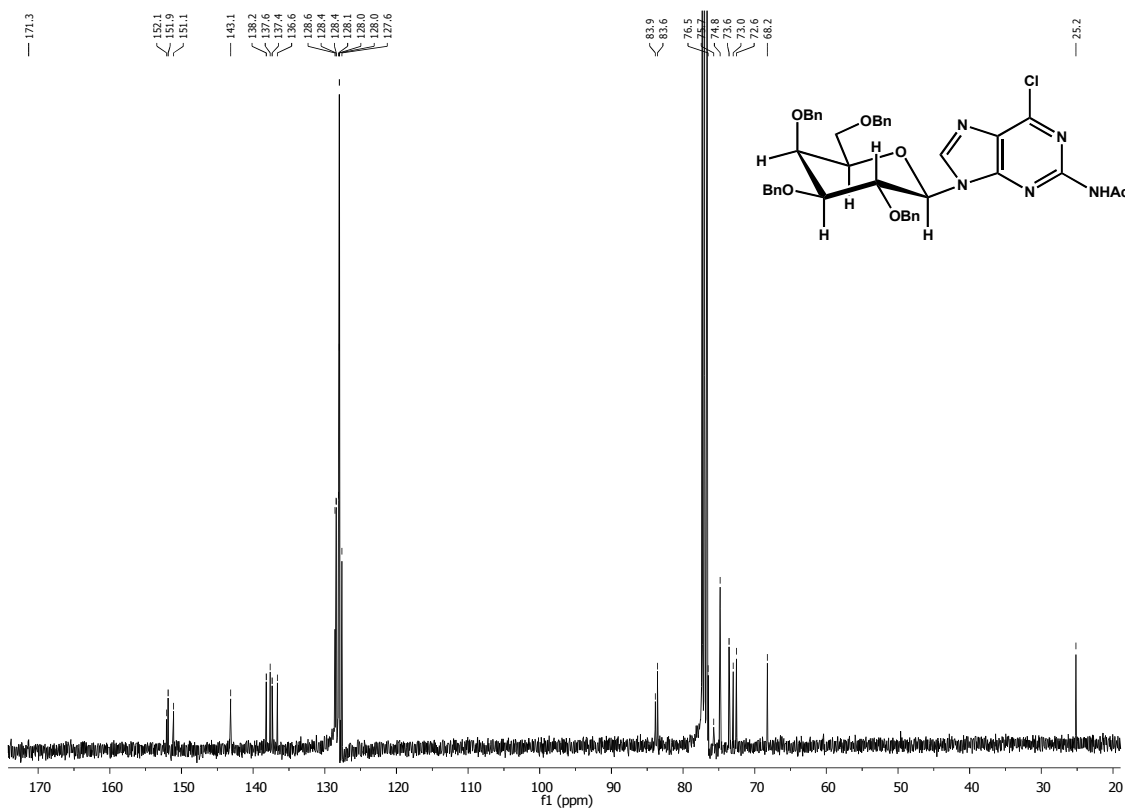

**Figure S40.** <sup>13</sup>C NMR spectrum of 2-(Acetylamino)-6-chloro-9-(2,3,4,6-tetra-*O*-benzyl-β-D-galactopyranosyl)purine (20)

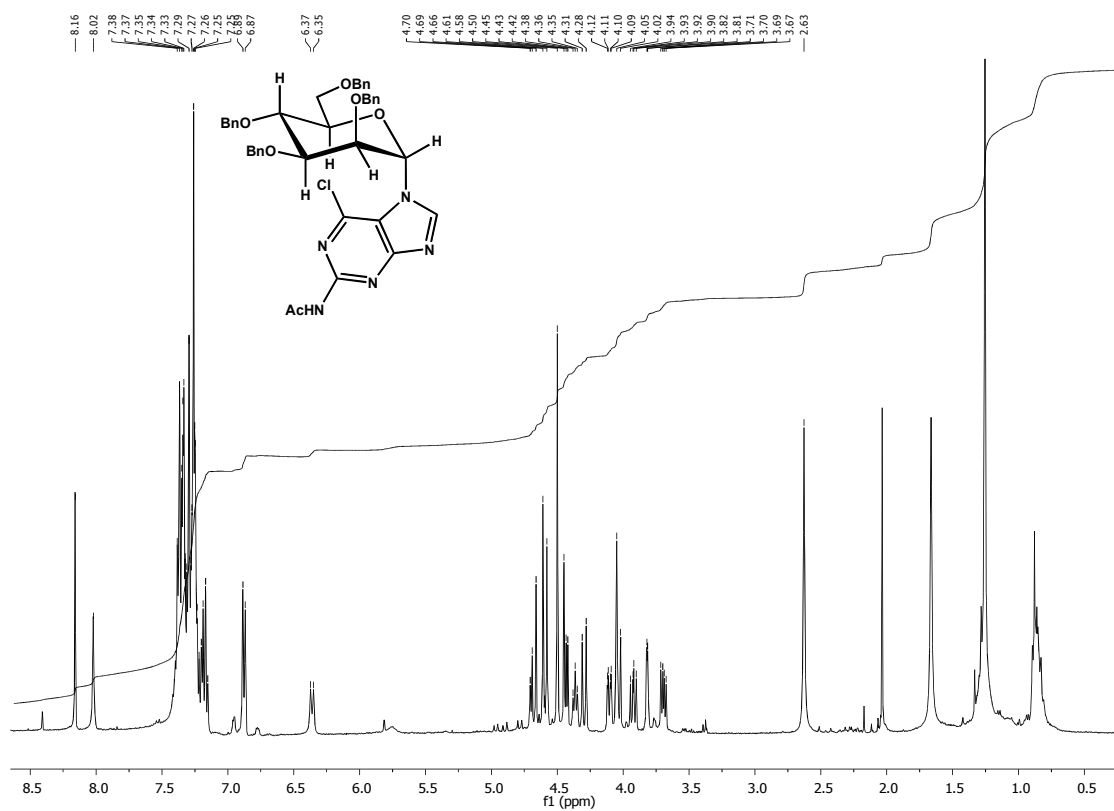

**Figure S41.**  $^1\text{H}$  NMR spectrum of 2-(Acetylamino)-6-chloro-7-(2,3,4,6-tetra-*O*-benzyl- $\alpha$ -D-mannopyranosyl)purine (**21**)

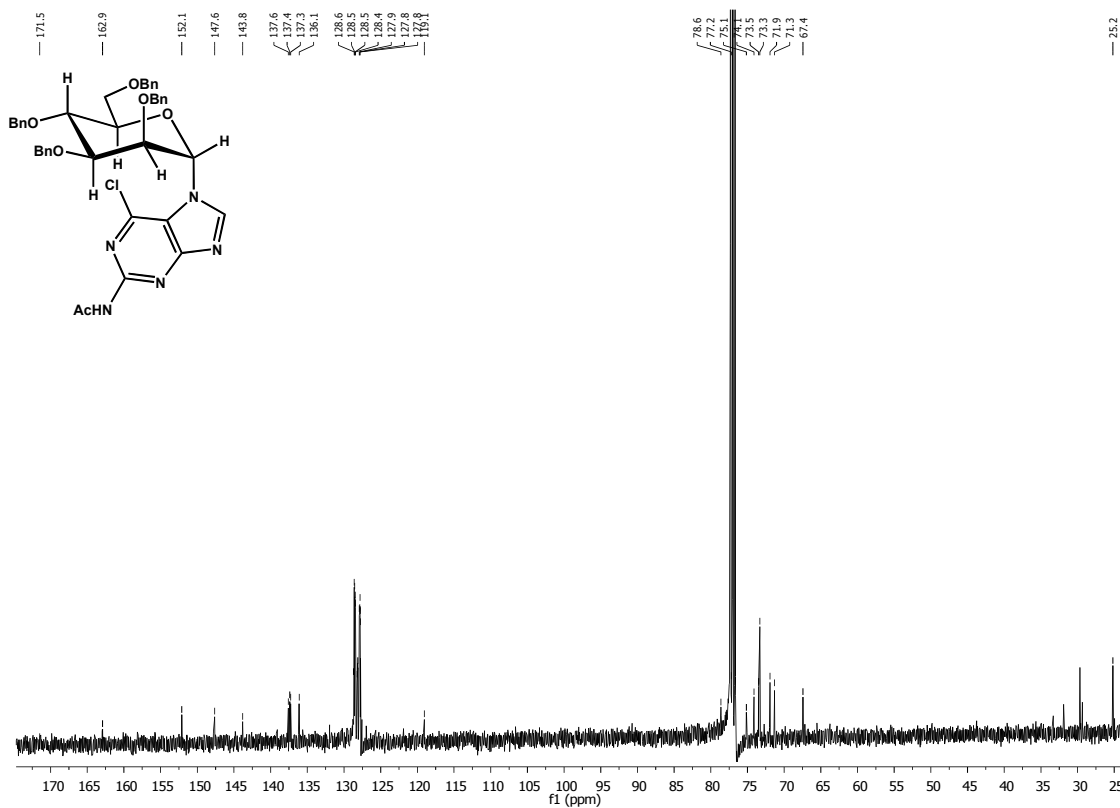

**Figure S42.**  $^{13}\text{C}$  NMR spectrum of 2-(Acetylamino)-6-chloro-7-(2,3,4,6-tetra-*O*-benzyl- $\alpha$ -D-mannopyranosyl)purine (**21**)



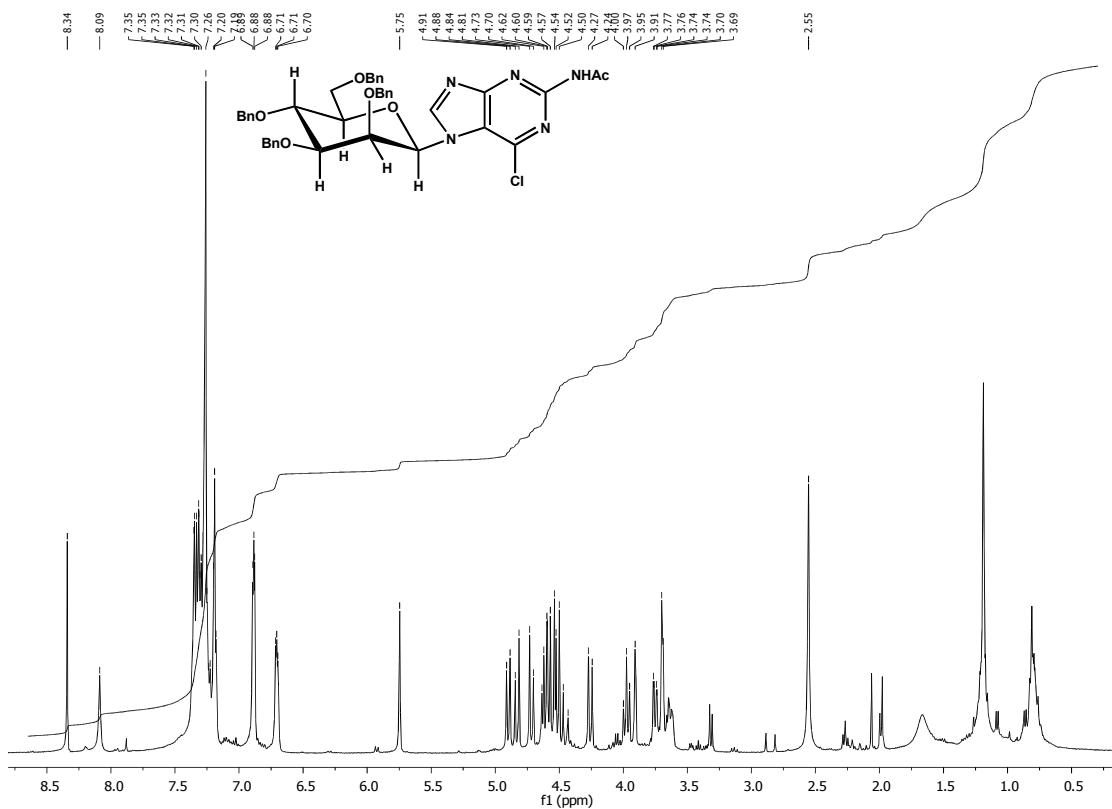

**Figure S43.** <sup>1</sup>H NMR spectrum of 2-(Acetylamino)-6-chloro-7-(2,3,4,6-tetra-*O*-benzyl-β-D-mannopyranosyl)purine (22)

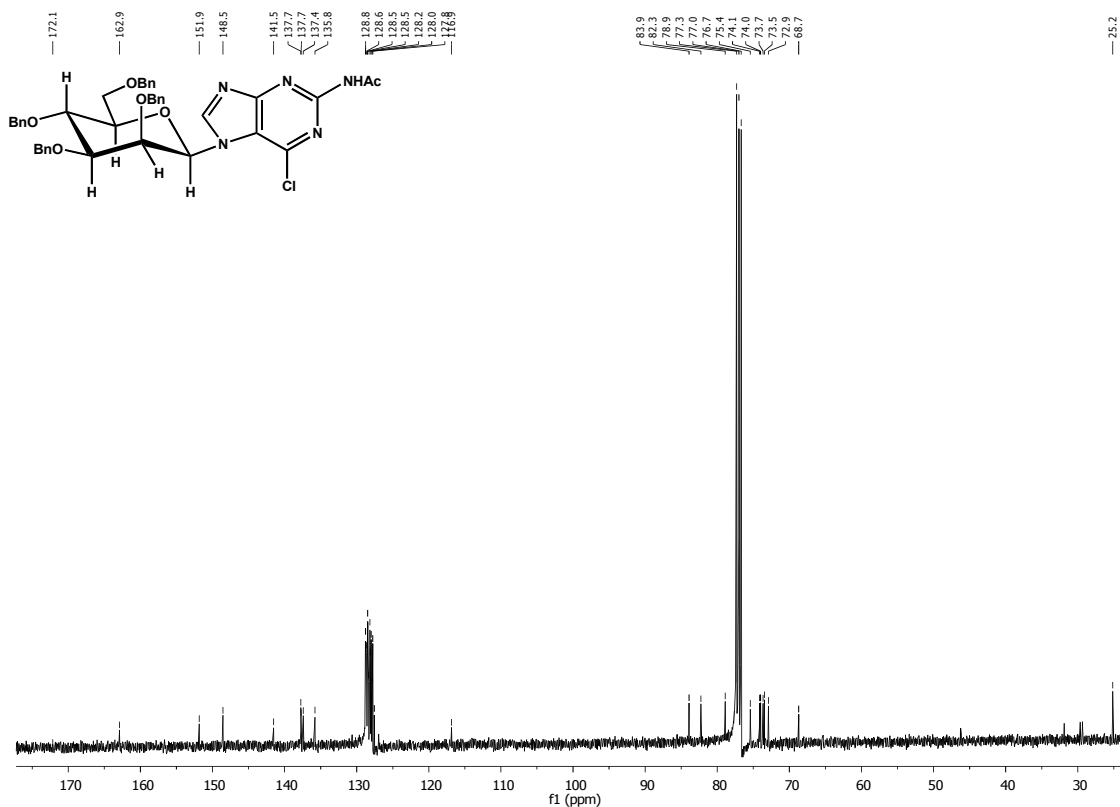

**Figure S44.** <sup>13</sup>C NMR spectrum of 2-(Acetylamino)-6-chloro-7-(2,3,4,6-tetra-*O*-benzyl-β-D-mannopyranosyl)purine (22)
